# Supplementary material
Source: PubMed Central journal article supplement (PMC2525609)

## Supporting Information

### Two Novel 1,2,4,5-Tetrazines that Participate in Inverse Electron Demand Diels–Alder Reactions with an Unexpected Regioselectivity

Akiyuki Hamasaki, Richard Ducray and Dale L. Boger\*

*Department of Chemistry and The Skaggs Institute for Chemical Biology,  
The Scripps Research Institute, 10550 North Torrey Pines Road, La Jolla, CA 92037*

|                                 |     |
|---------------------------------|-----|
| <sup>1</sup> H NMR of <b>4</b>  | S3  |
| <sup>1</sup> H NMR of <b>5</b>  | S4  |
| <sup>1</sup> H NMR of <b>7a</b> | S4  |
| <sup>1</sup> H NMR of <b>7b</b> | S6  |
| <sup>1</sup> H NMR of <b>7c</b> | S7  |
| <sup>1</sup> H NMR of <b>7d</b> | S8  |
| <sup>1</sup> H NMR of <b>7e</b> | S9  |
| <sup>1</sup> H NMR of <b>7f</b> | S10 |
| <sup>1</sup> H NMR of <b>7g</b> | S11 |
| <sup>1</sup> H NMR of <b>7h</b> | S12 |
| <sup>1</sup> H NMR of <b>7i</b> | S13 |
| <sup>1</sup> H NMR of <b>7j</b> | S14 |
| <sup>1</sup> H NMR of <b>7k</b> | S15 |
| <sup>1</sup> H NMR of <b>7l</b> | S16 |
| <sup>1</sup> H NMR of <b>9a</b> | S17 |
| <sup>1</sup> H NMR of <b>9b</b> | S18 |
| <sup>1</sup> H NMR of <b>9c</b> | S19 |
| <sup>1</sup> H NMR of <b>9d</b> | S20 |
| <sup>1</sup> H NMR of <b>9e</b> | S21 |
| <sup>1</sup> H NMR of <b>9f</b> | S22 |

|                                  |     |
|----------------------------------|-----|
| <sup>1</sup> H NMR of <b>9g</b>  | S23 |
| <sup>1</sup> H NMR of <b>9h</b>  | S24 |
| <sup>1</sup> H NMR of <b>9i</b>  | S25 |
| <sup>1</sup> H NMR of <b>9j</b>  | S26 |
| <sup>1</sup> H NMR of <b>10a</b> | S27 |
| <sup>1</sup> H NMR of <b>10b</b> | S28 |
| <sup>1</sup> H NMR of <b>10c</b> | S29 |
| <sup>1</sup> H NMR of <b>10d</b> | S30 |

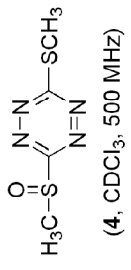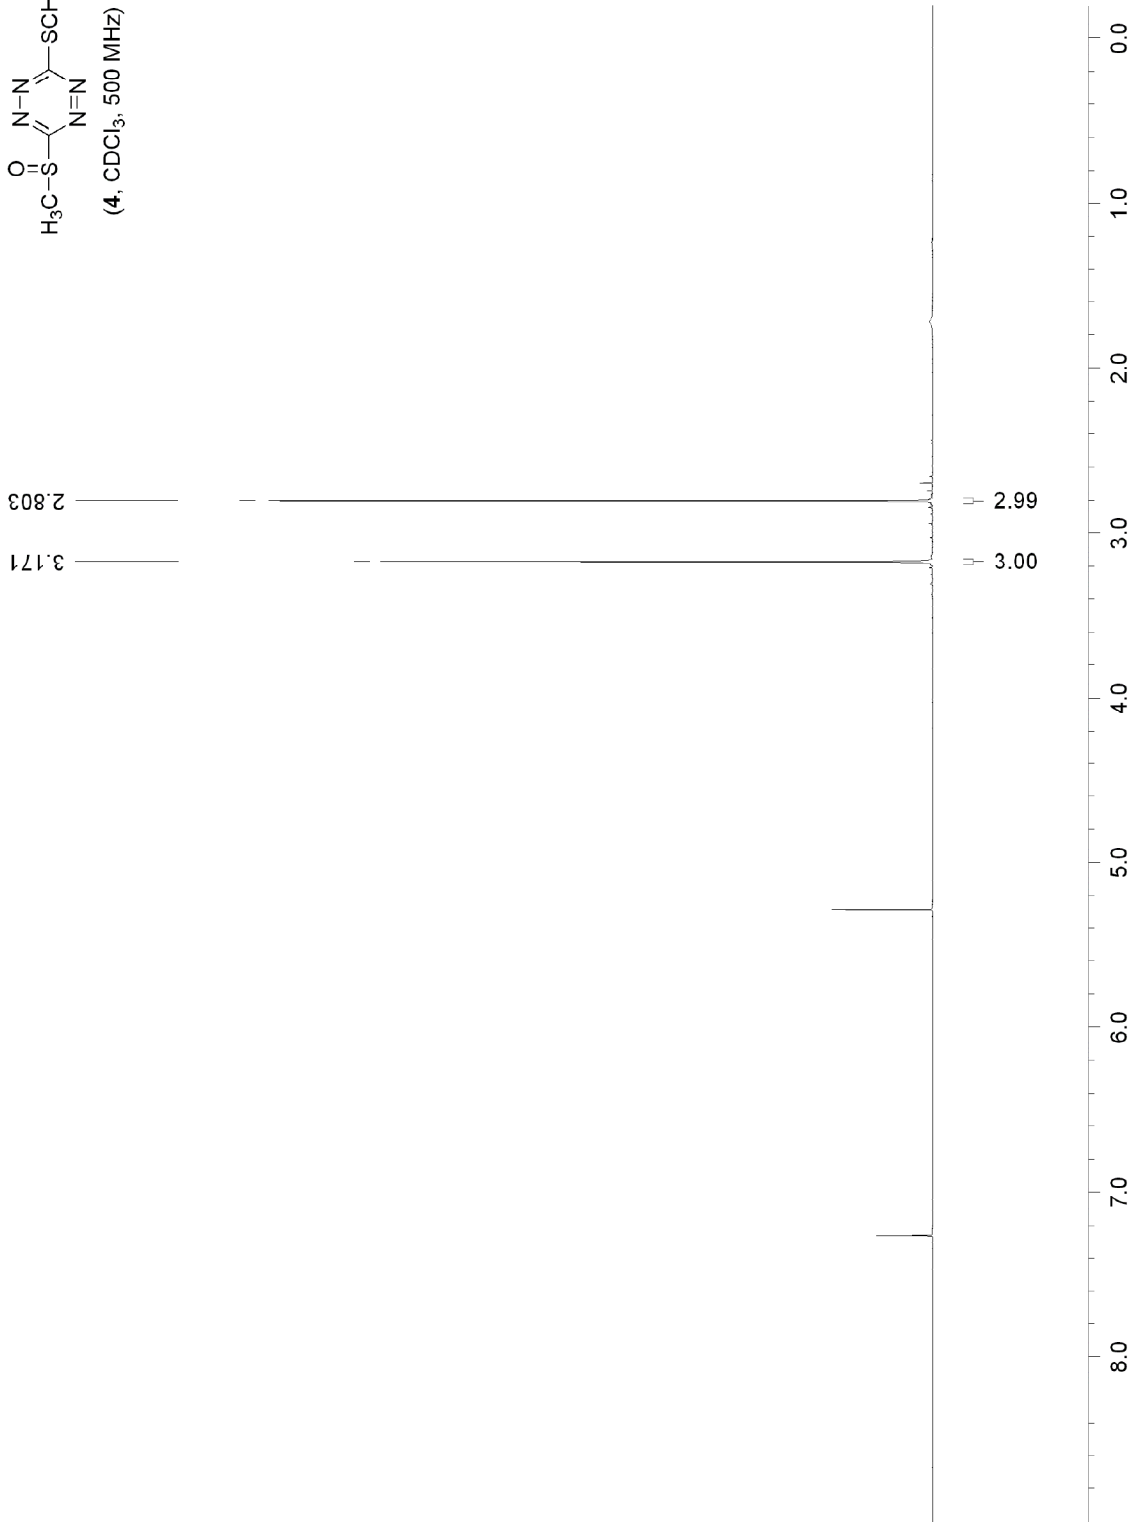

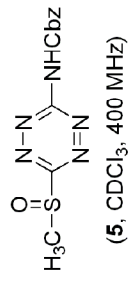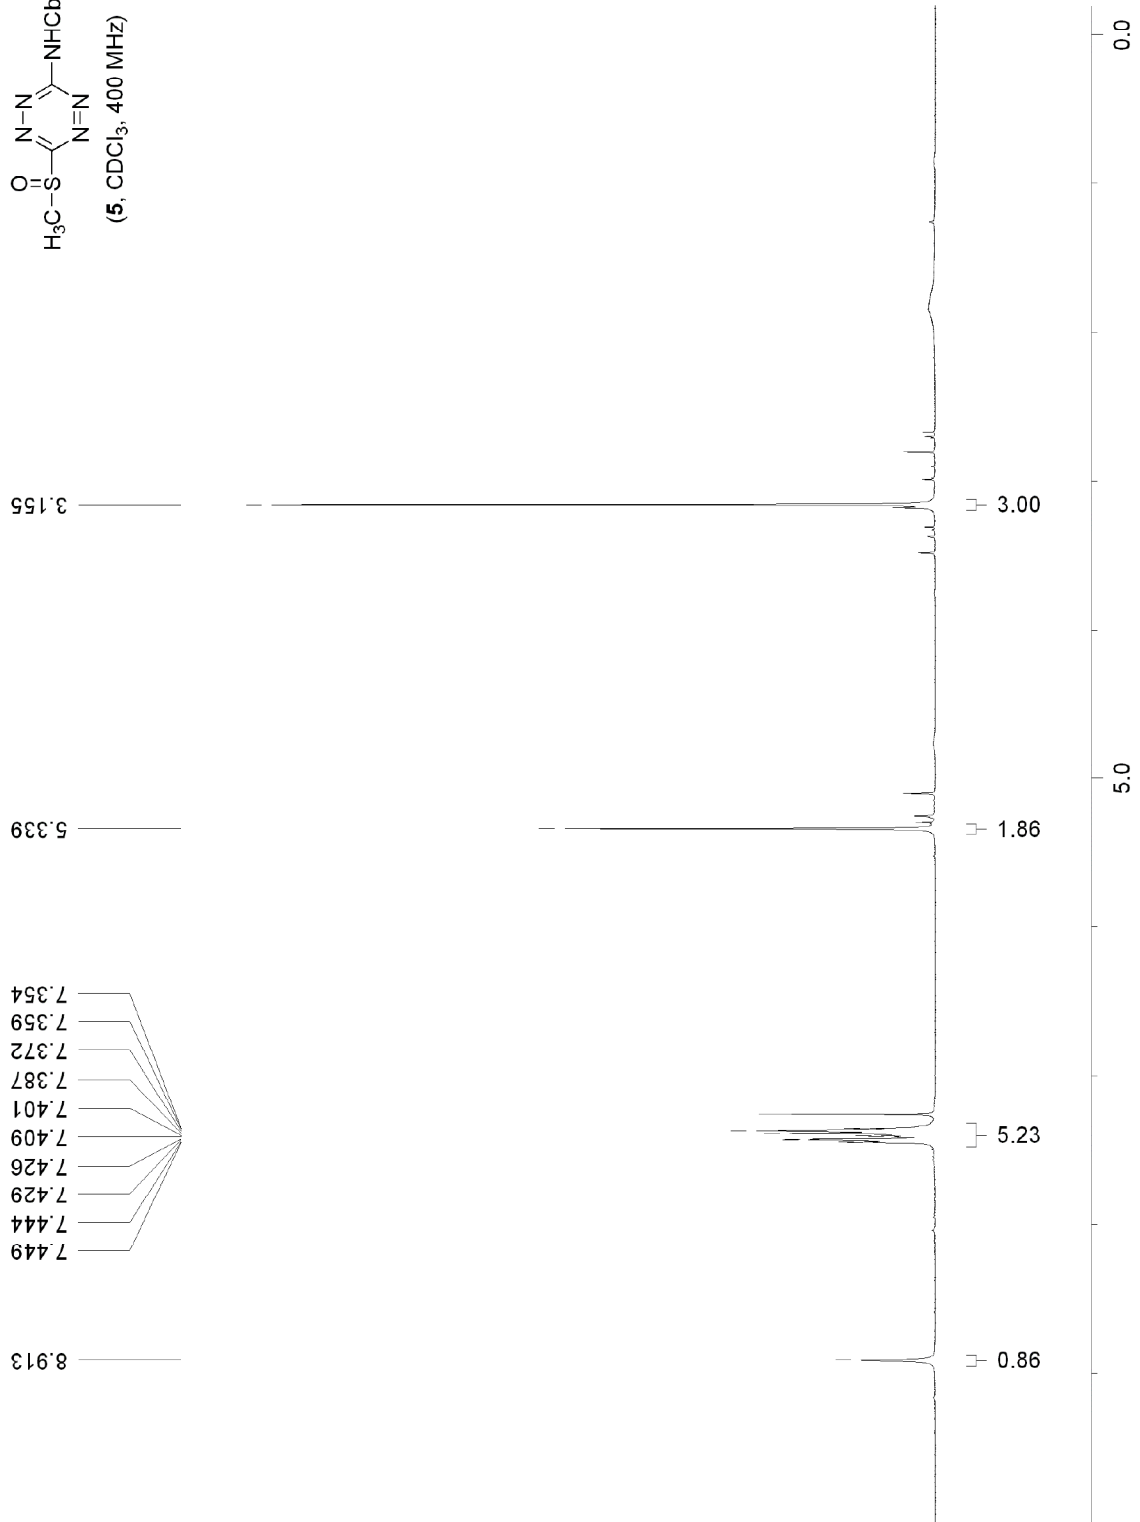

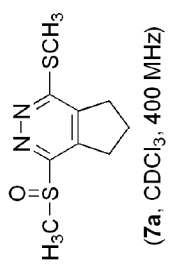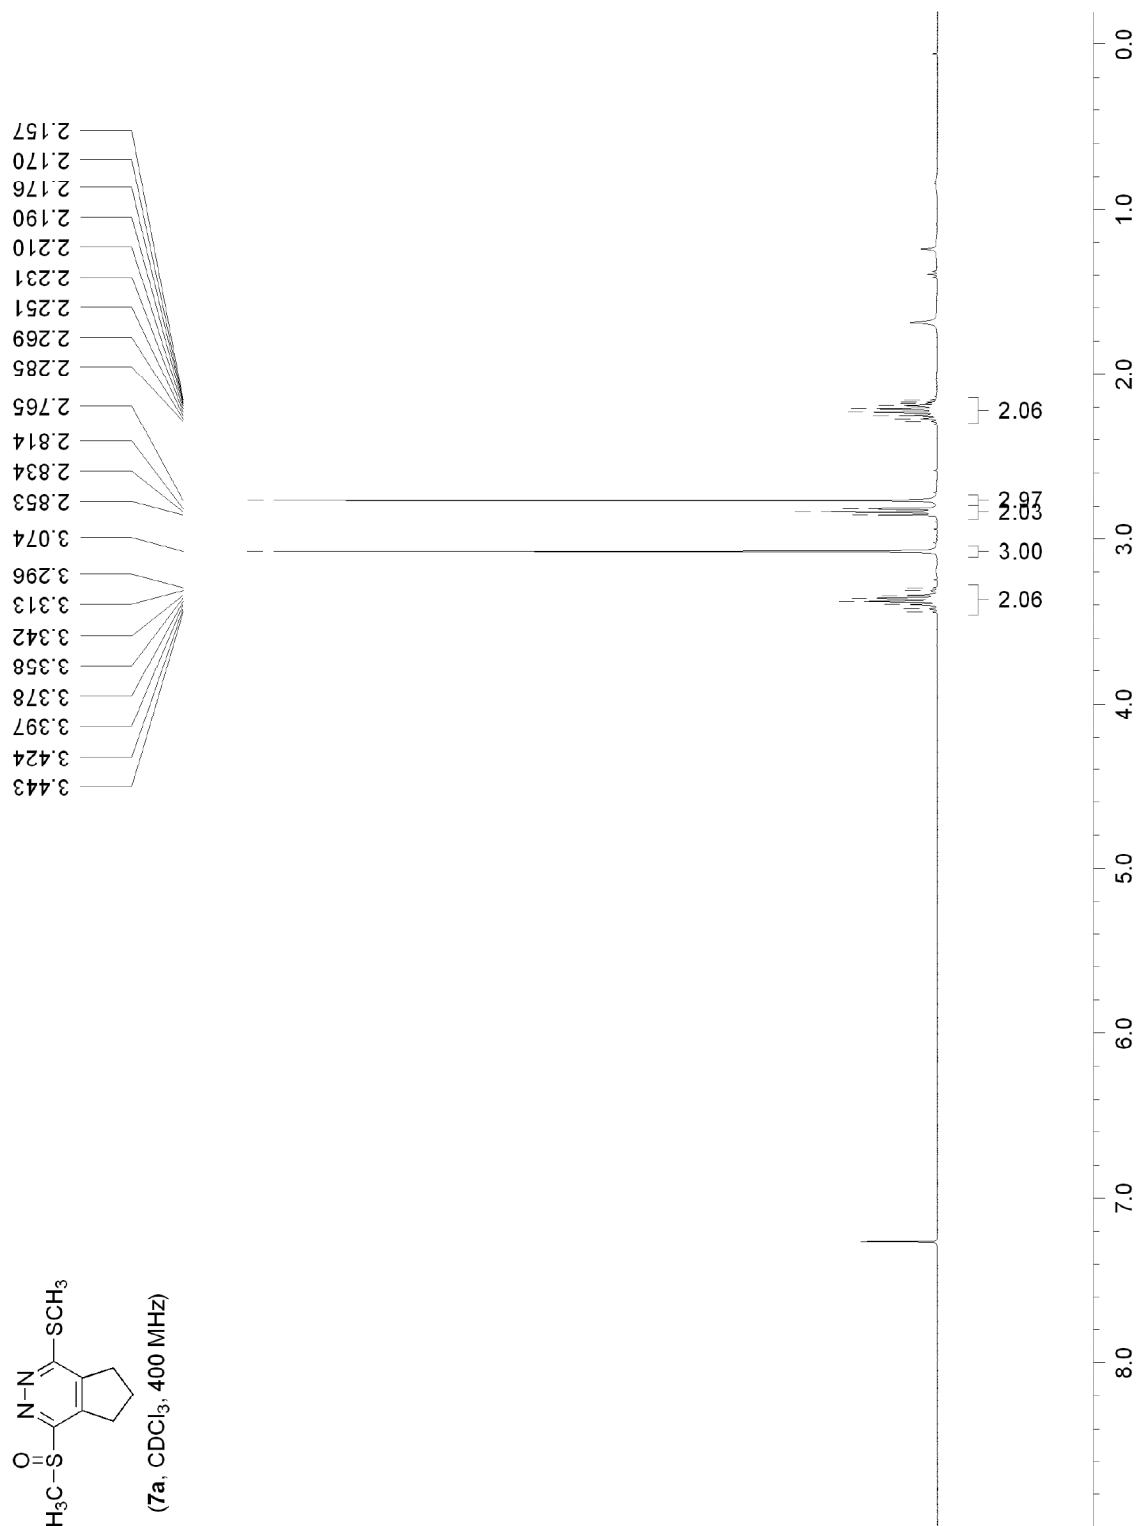

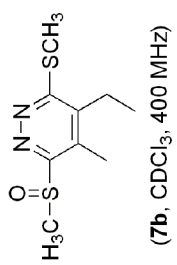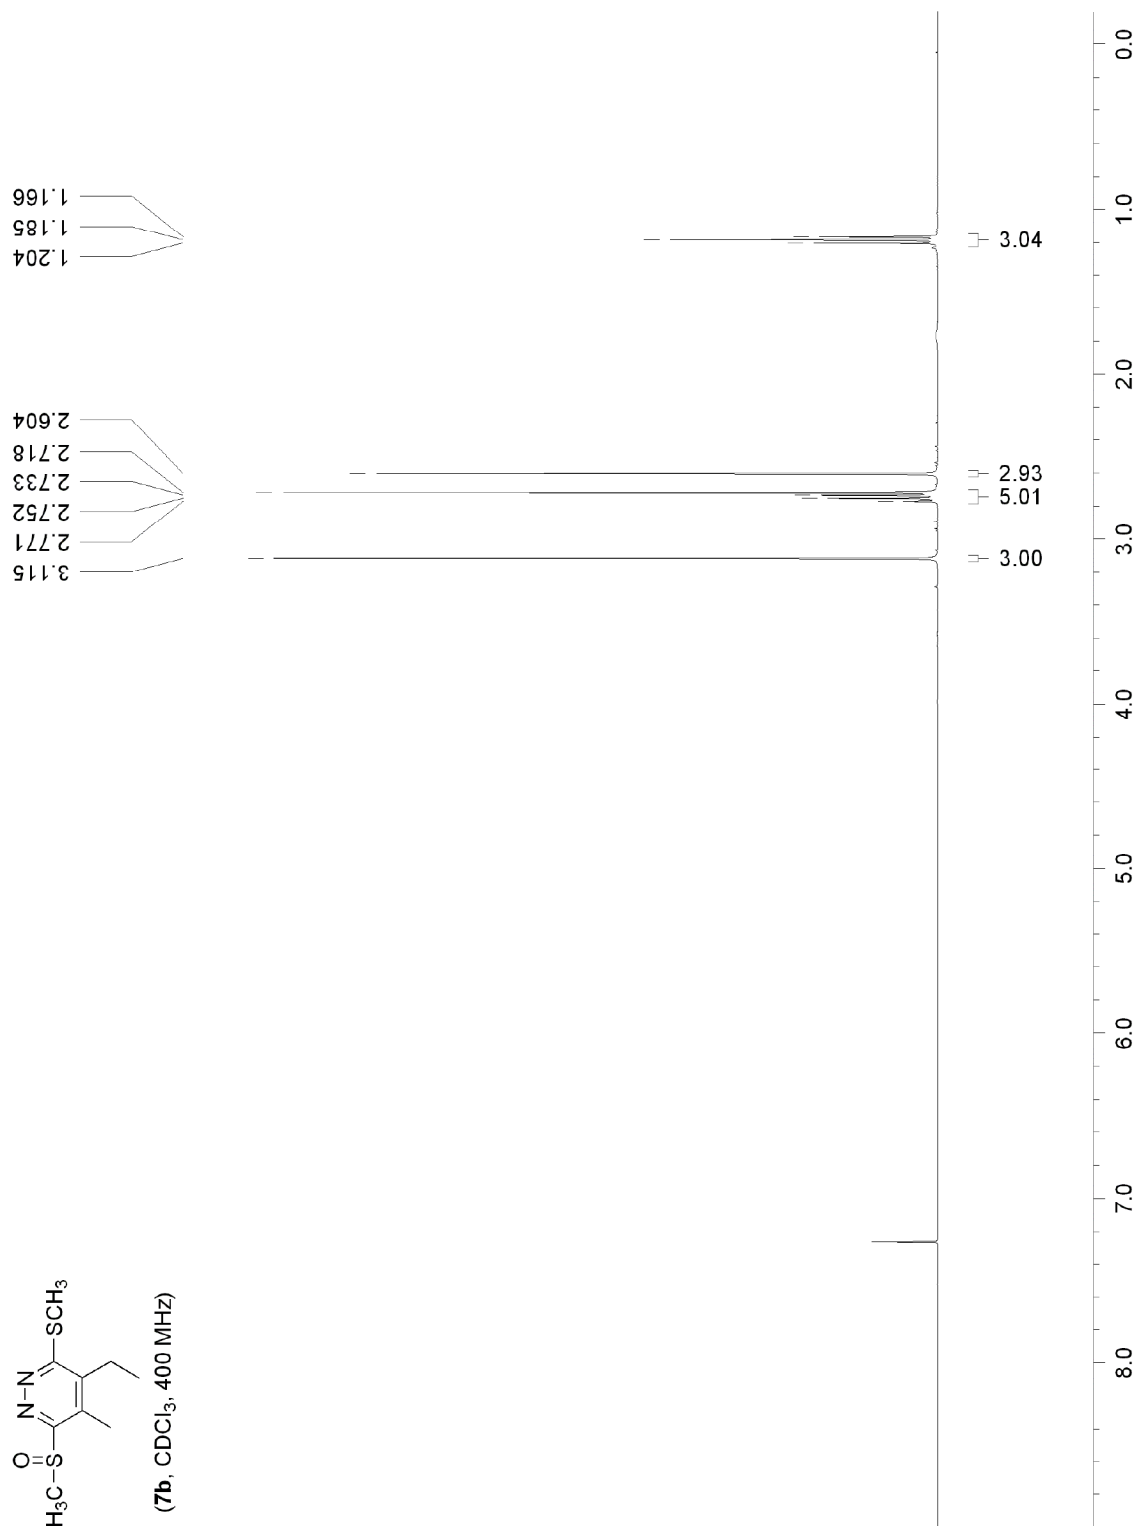

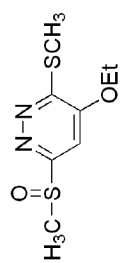

(7c, CDCl<sub>3</sub>, 400 MHz)

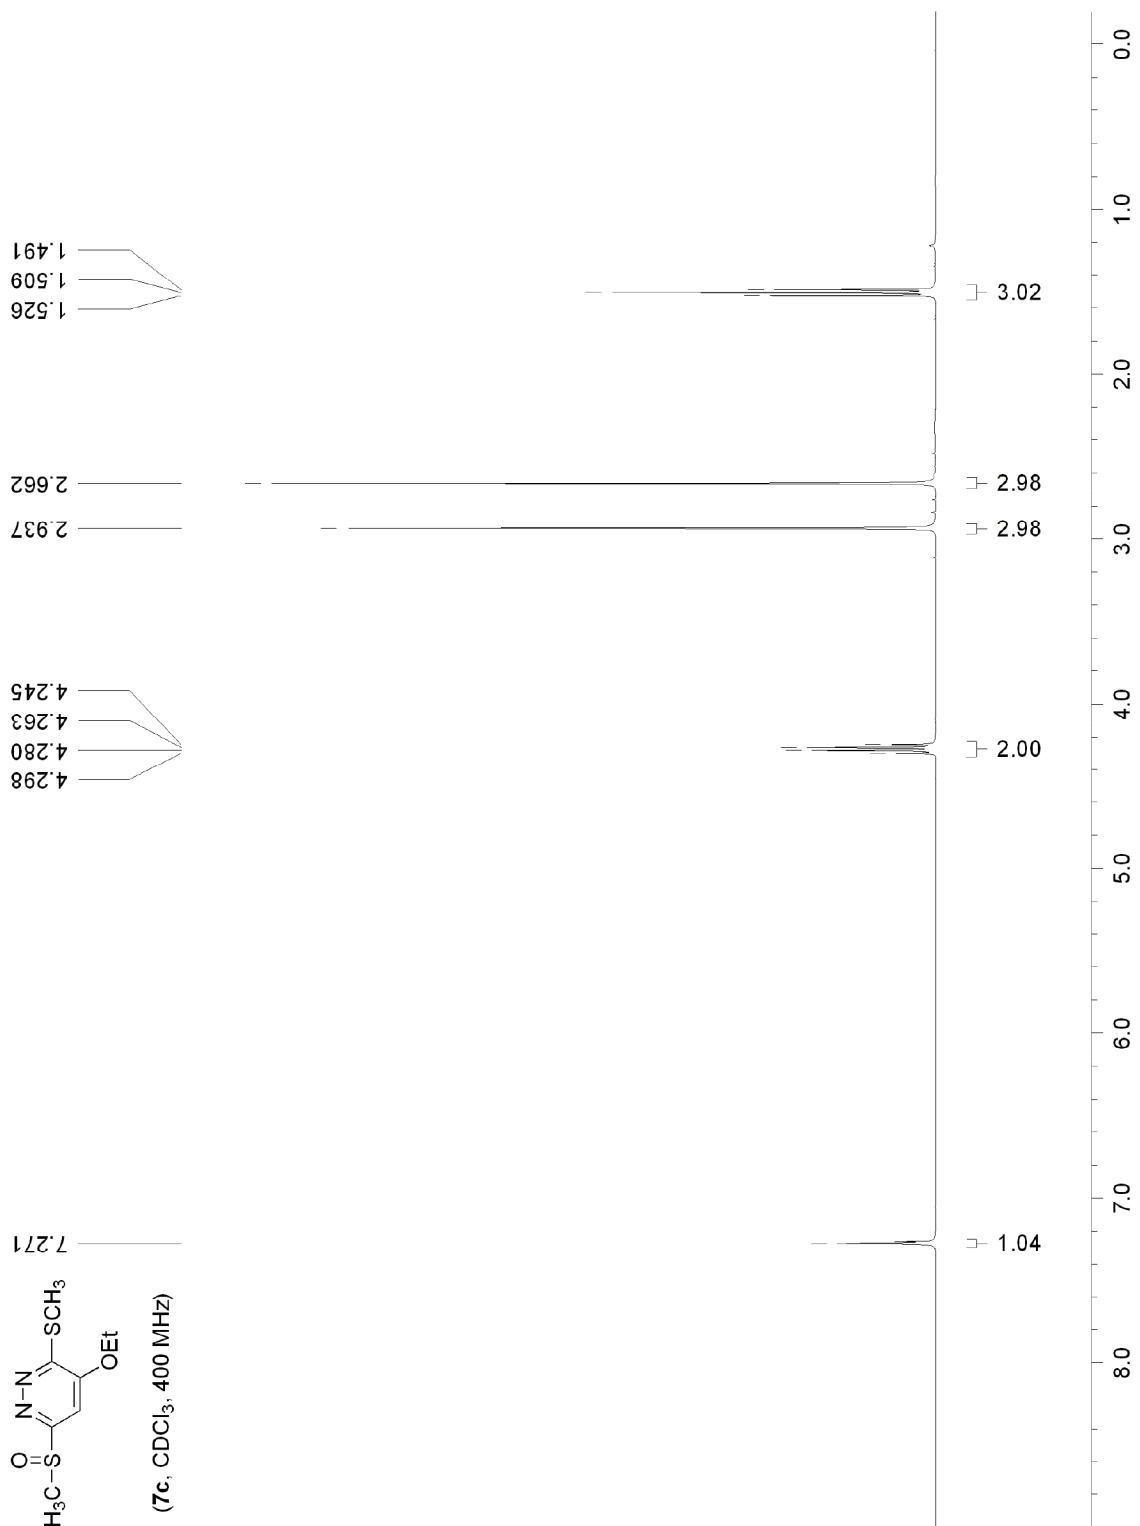

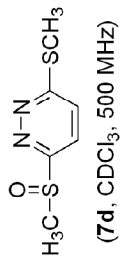

2.751  
2.974

7.917  
7.899  
7.580  
7.562

3.03  
3.15

1.01  
1.00

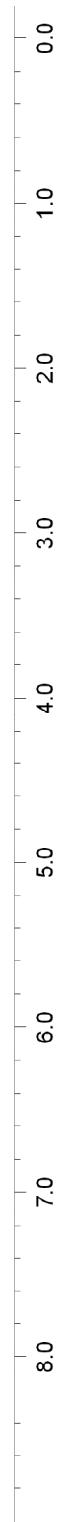



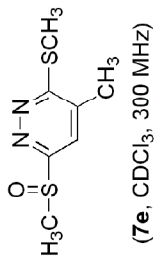

2.357  
2.359  
2.743  
2.945

7.740

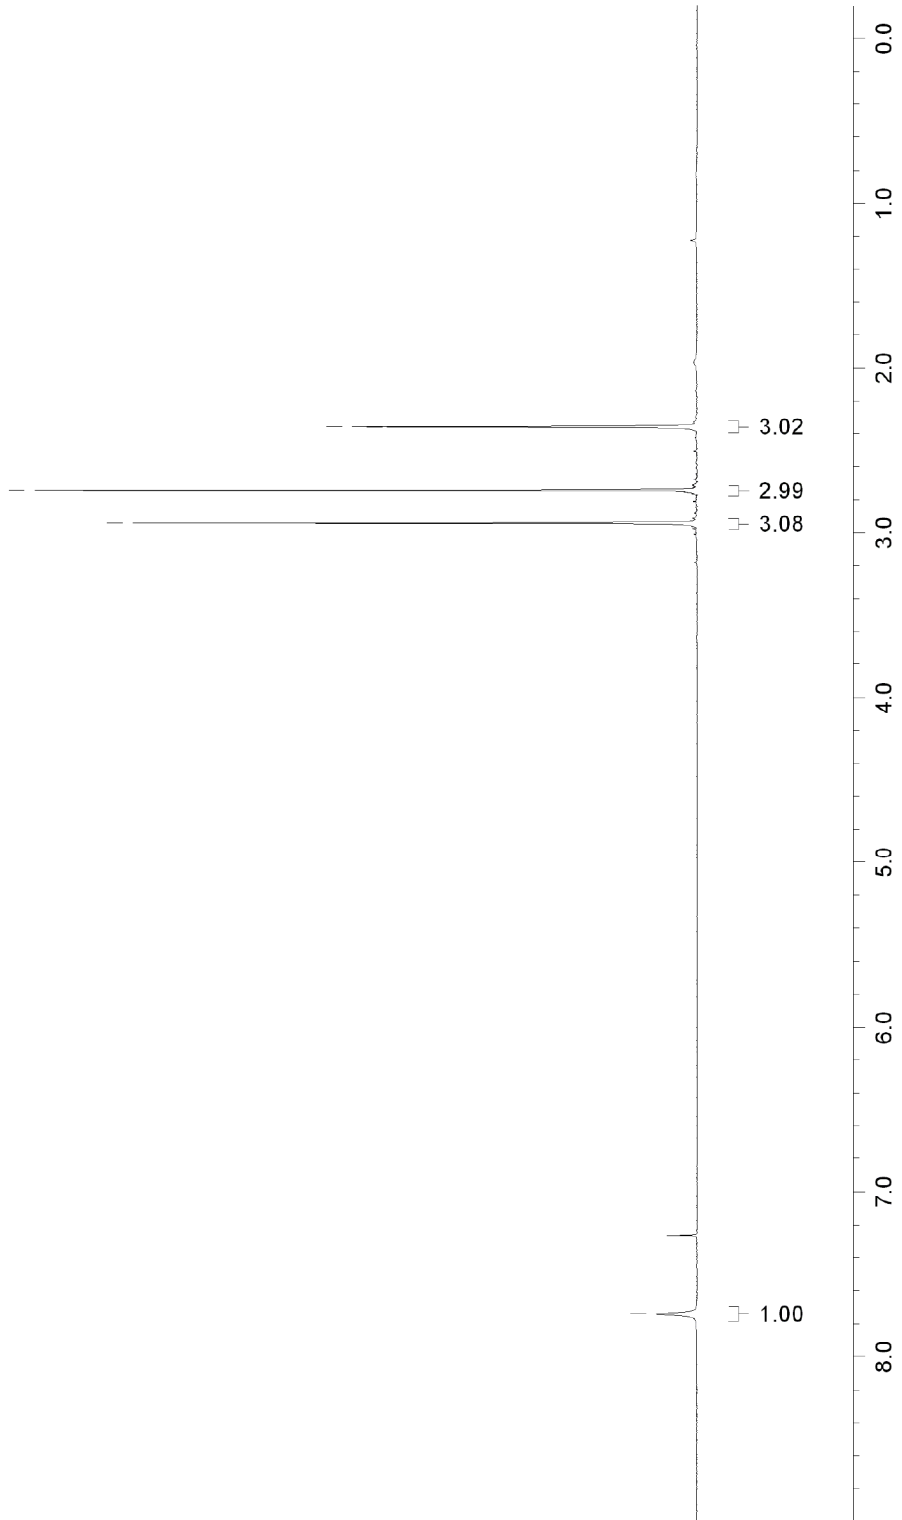

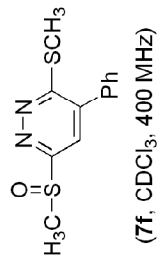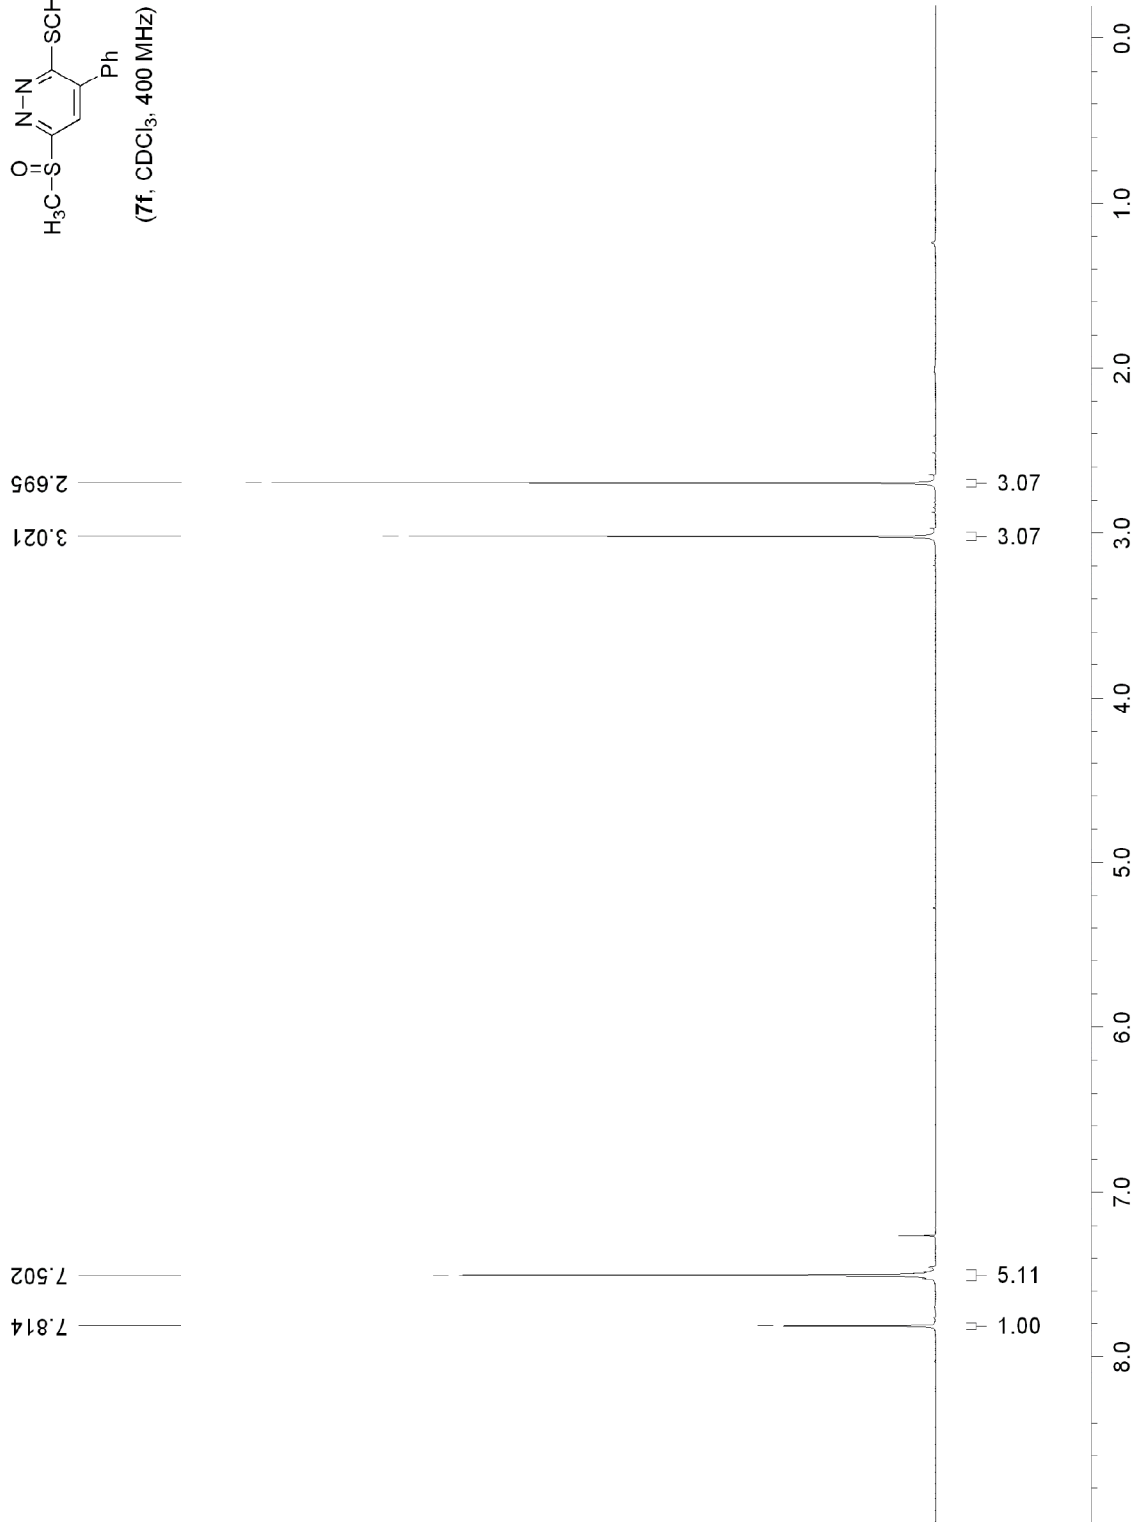

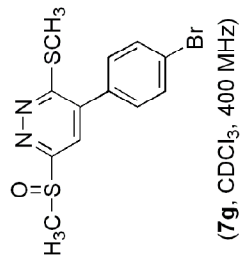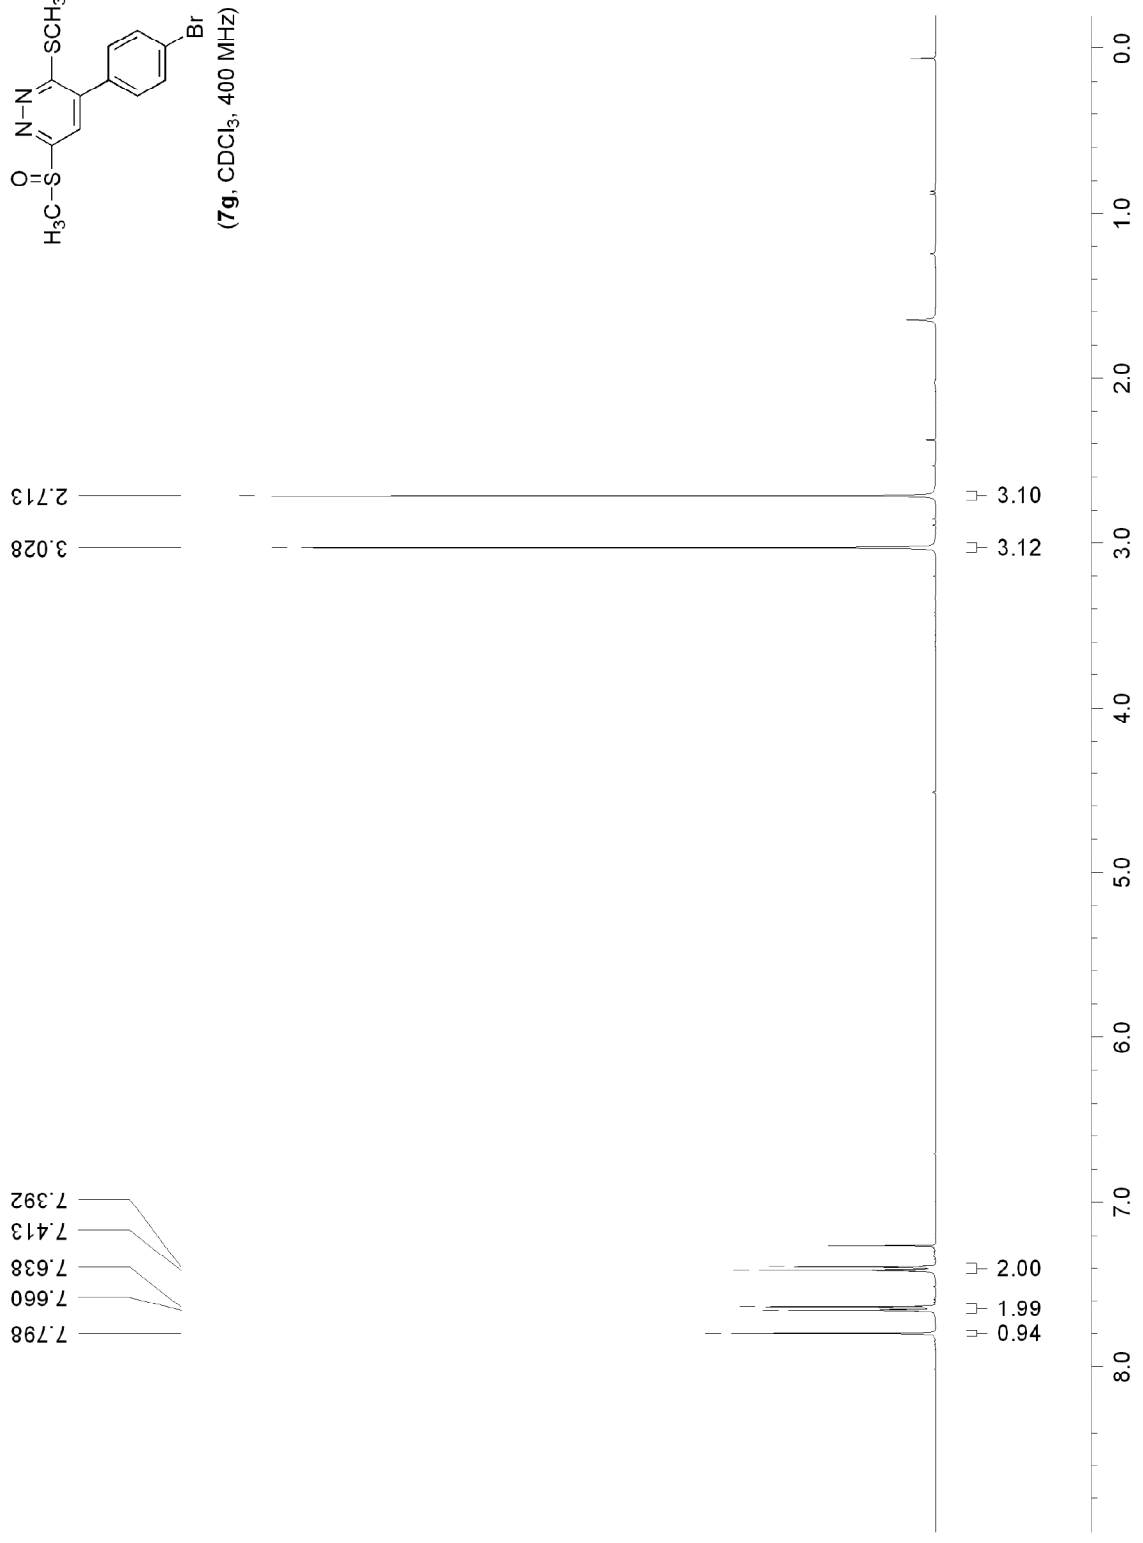

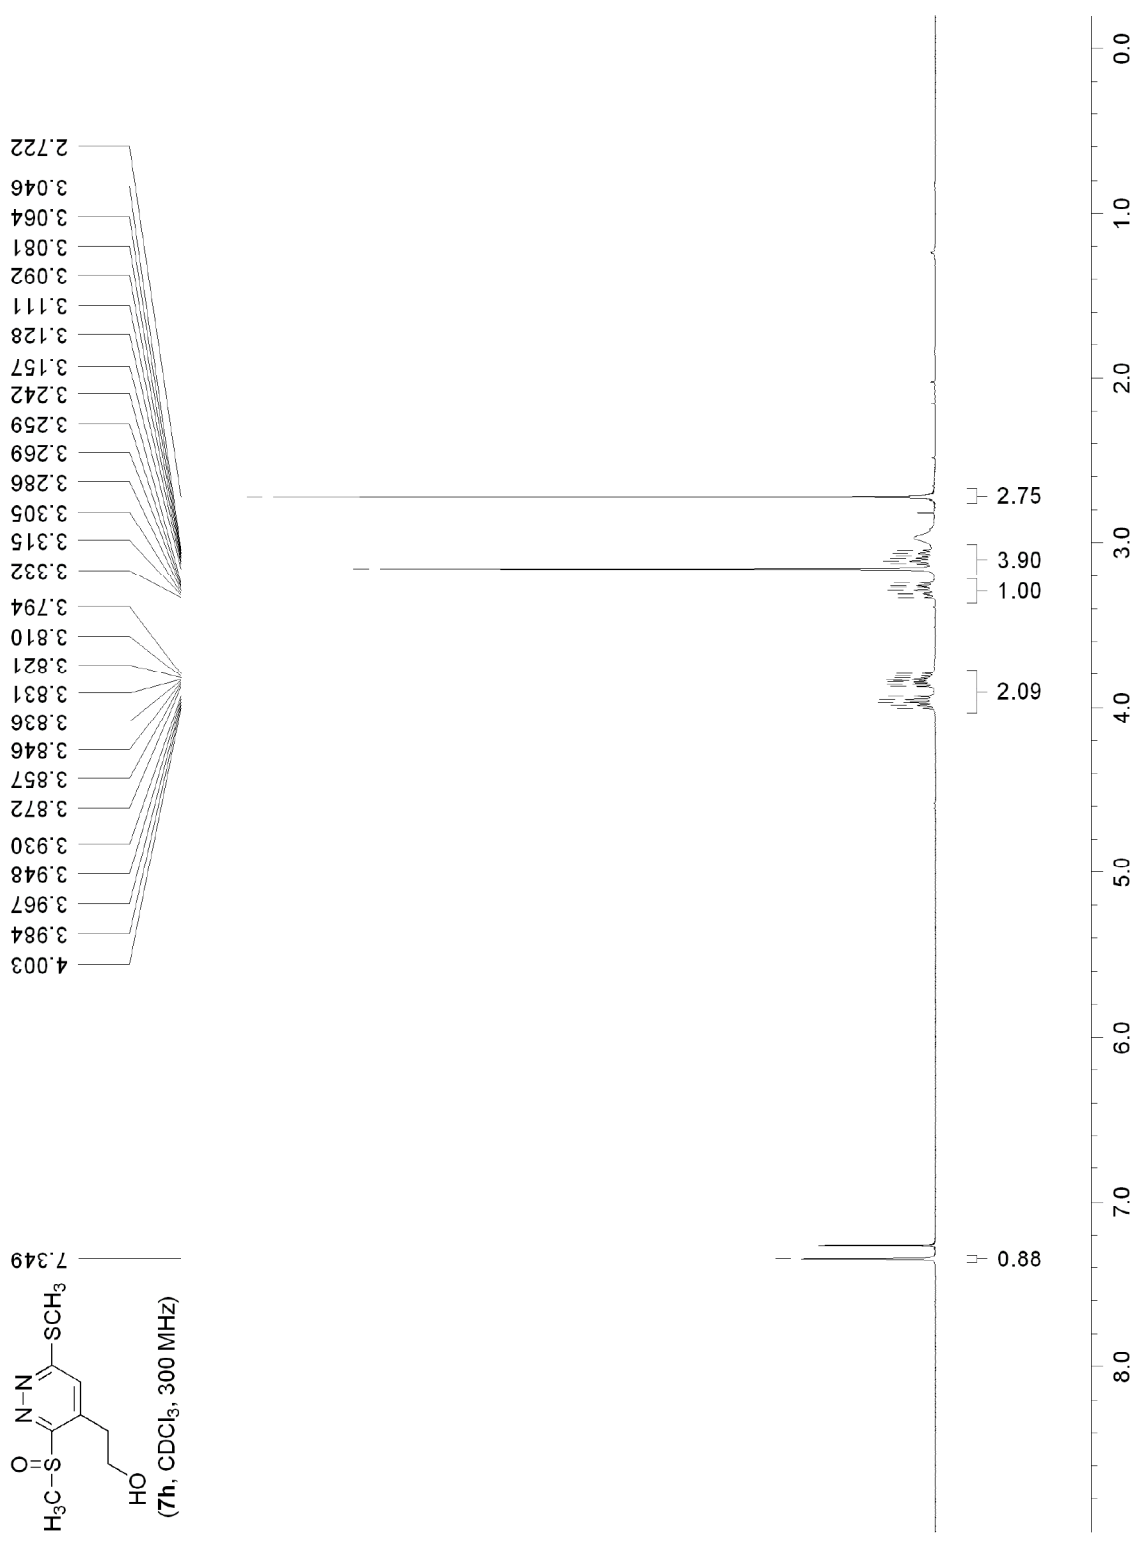

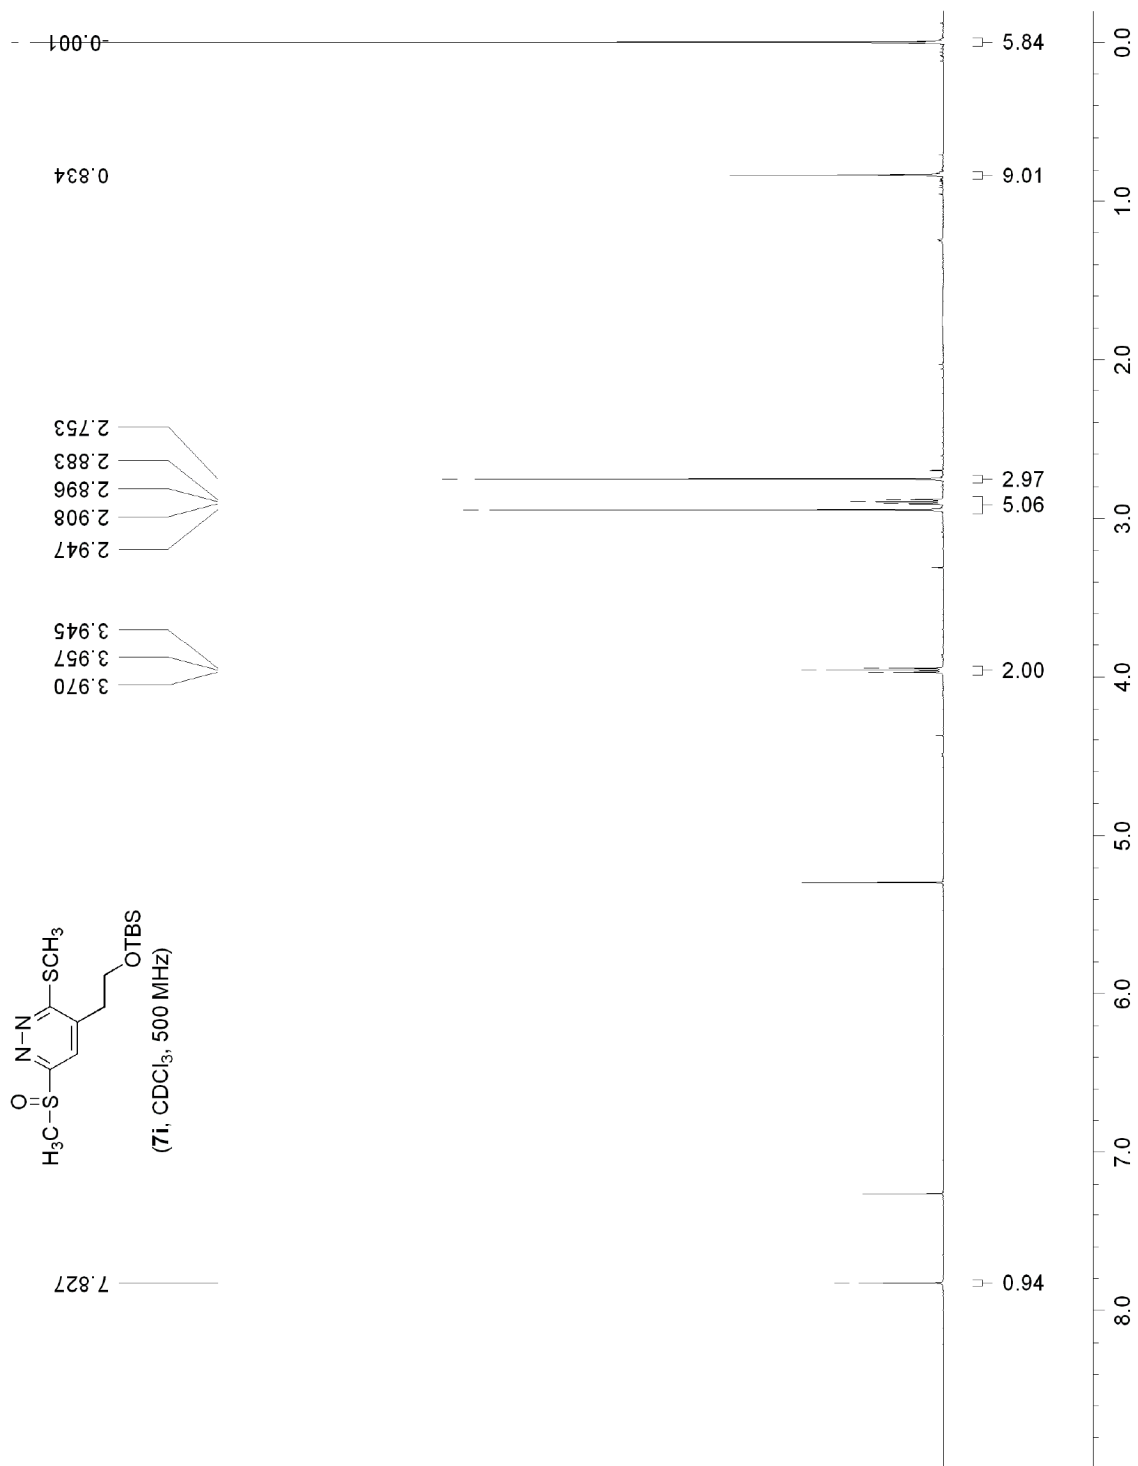

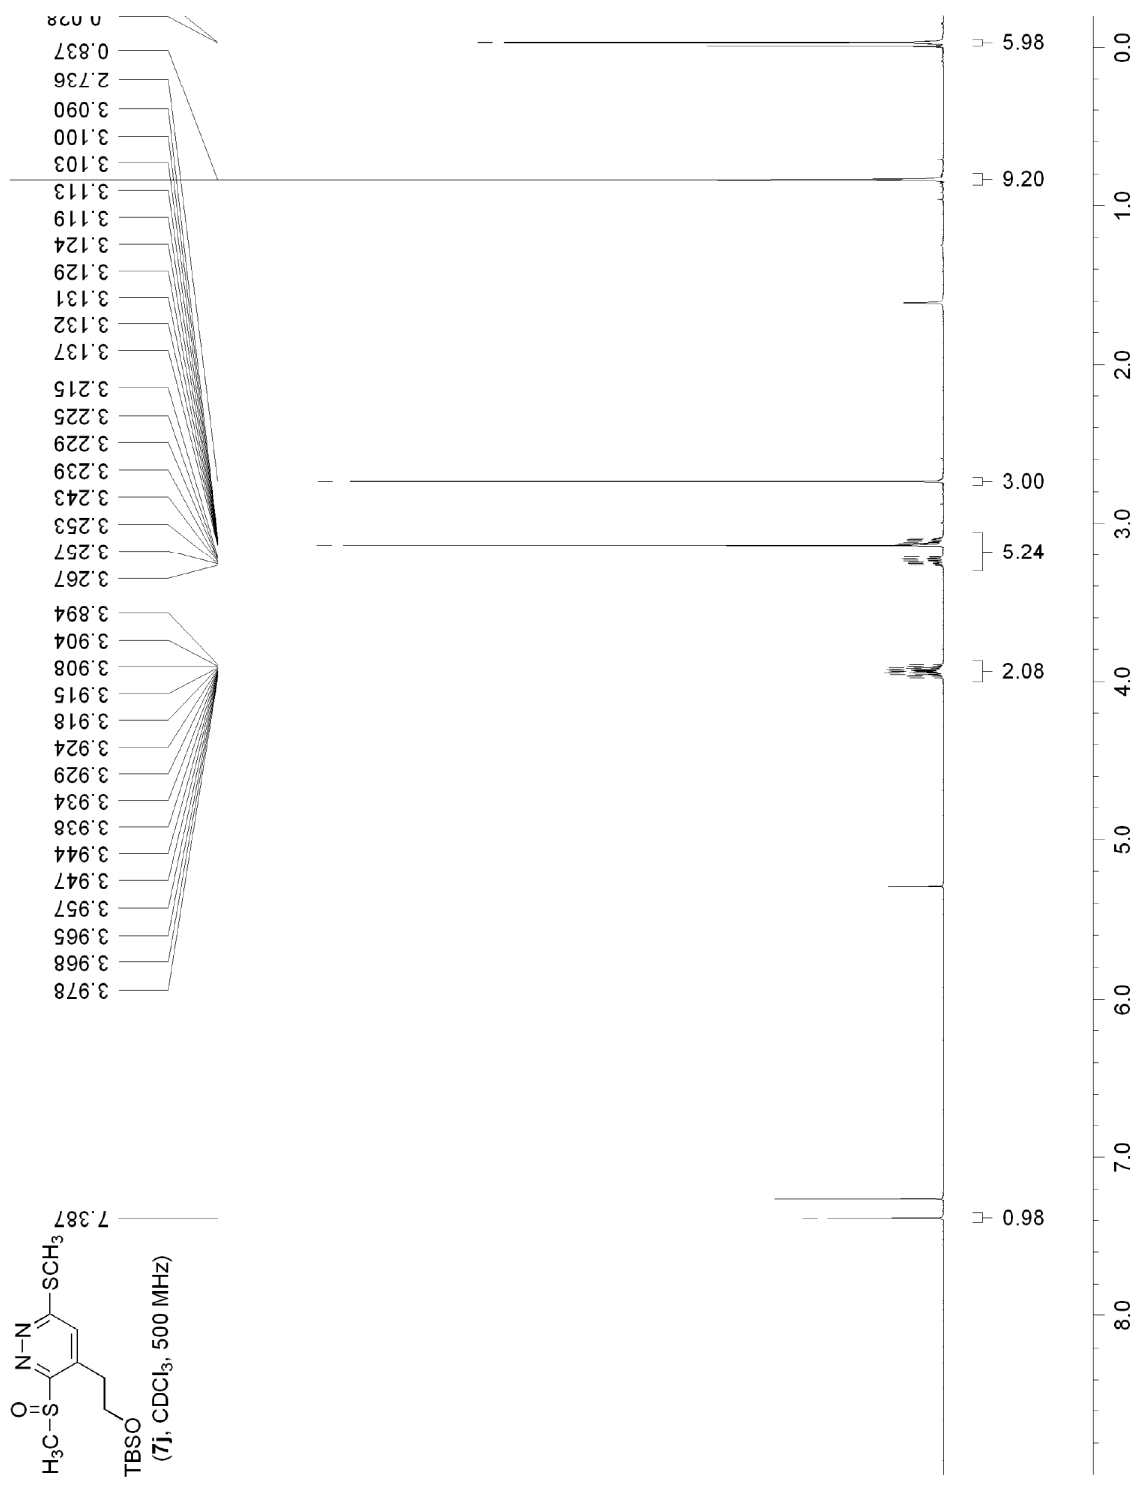

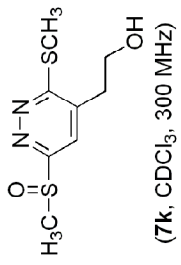

2.985  
2.968  
2.947  
2.927  
2.764

4.068  
4.048  
4.028

7.877

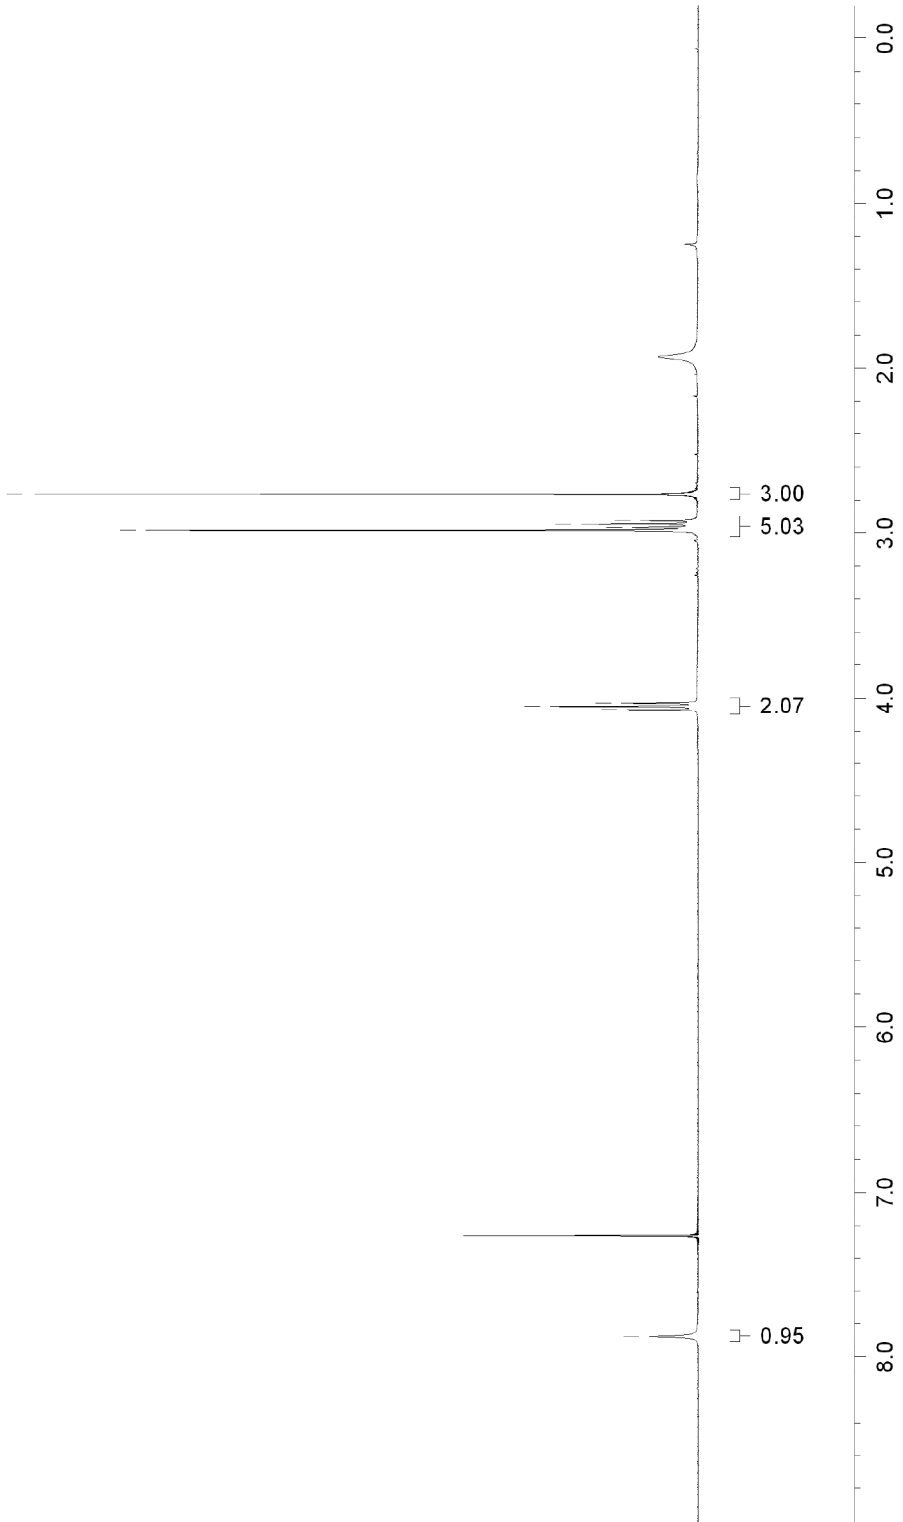

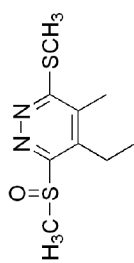

(71, CDCl<sub>3</sub>, 300 MHz)

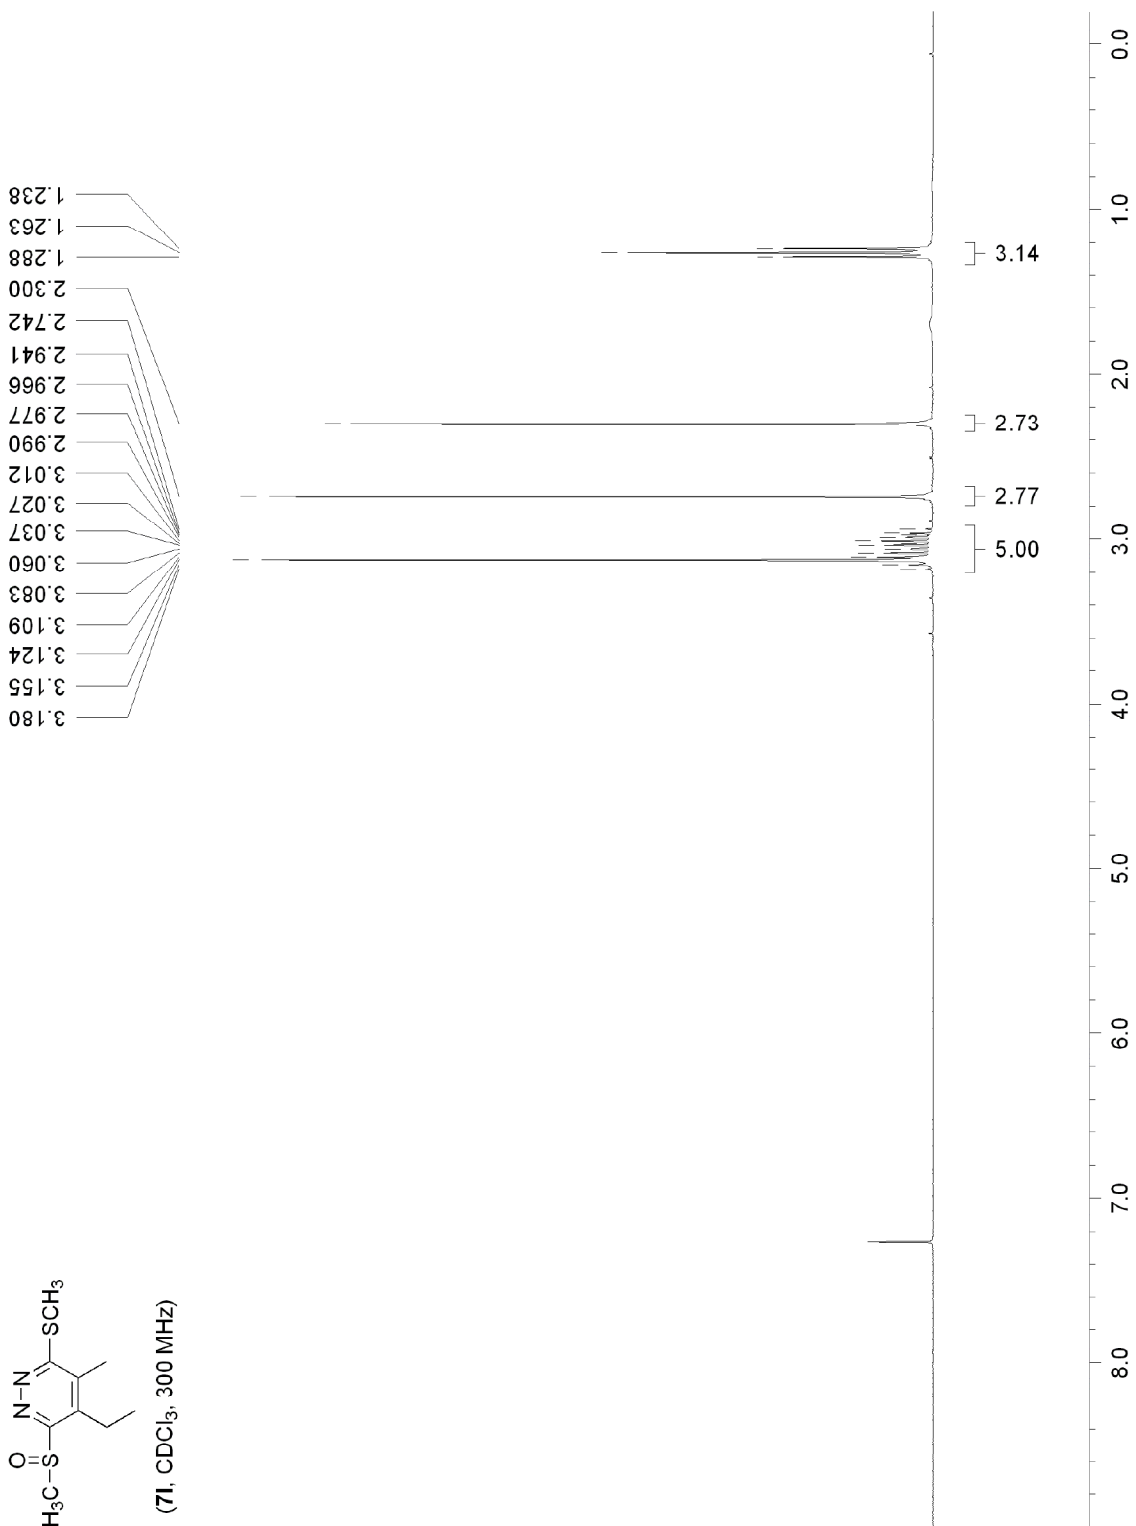



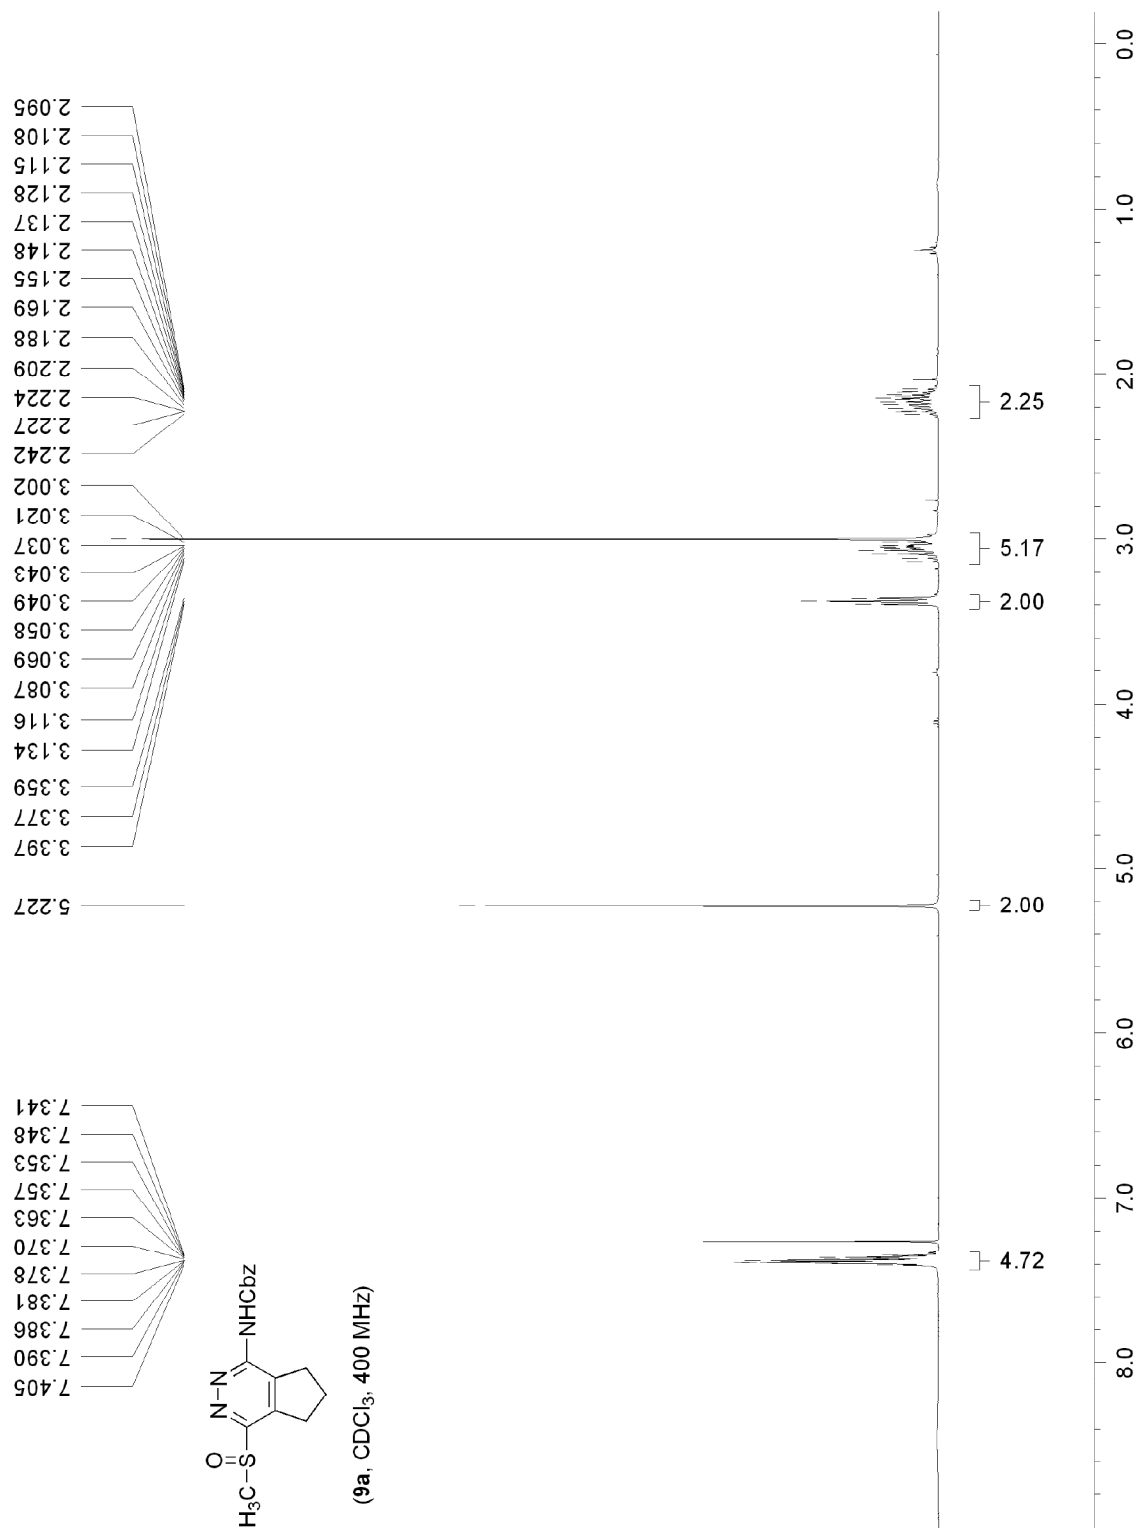

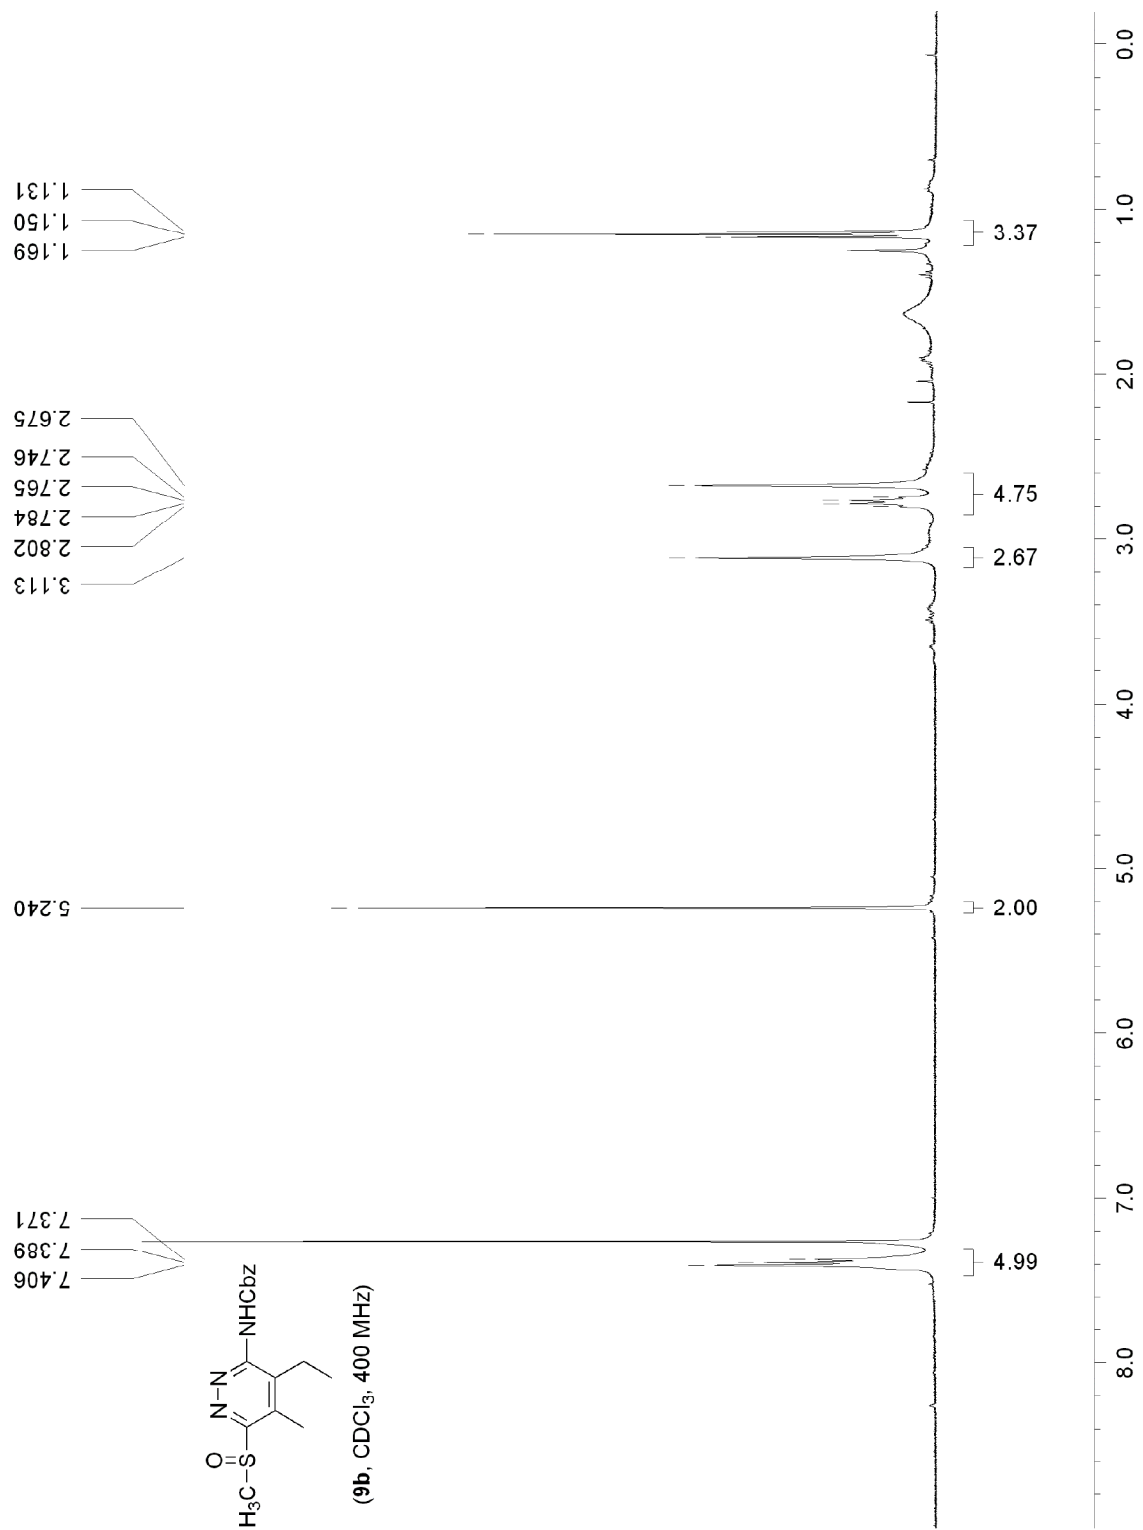

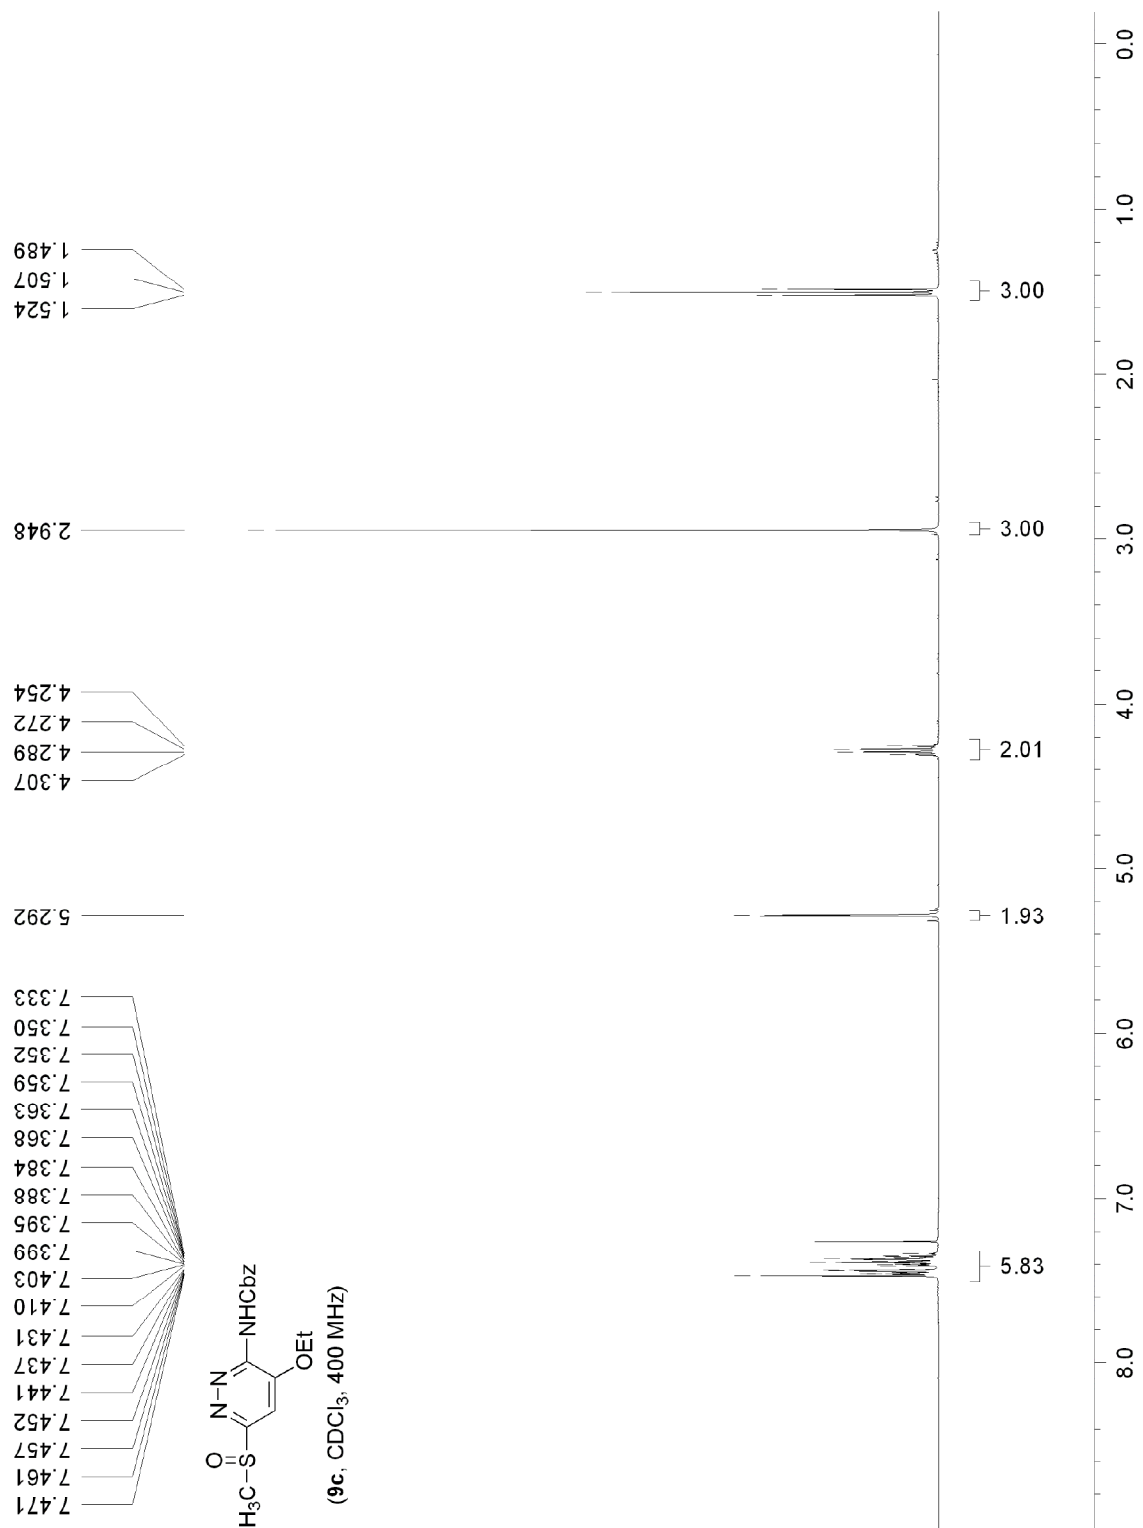

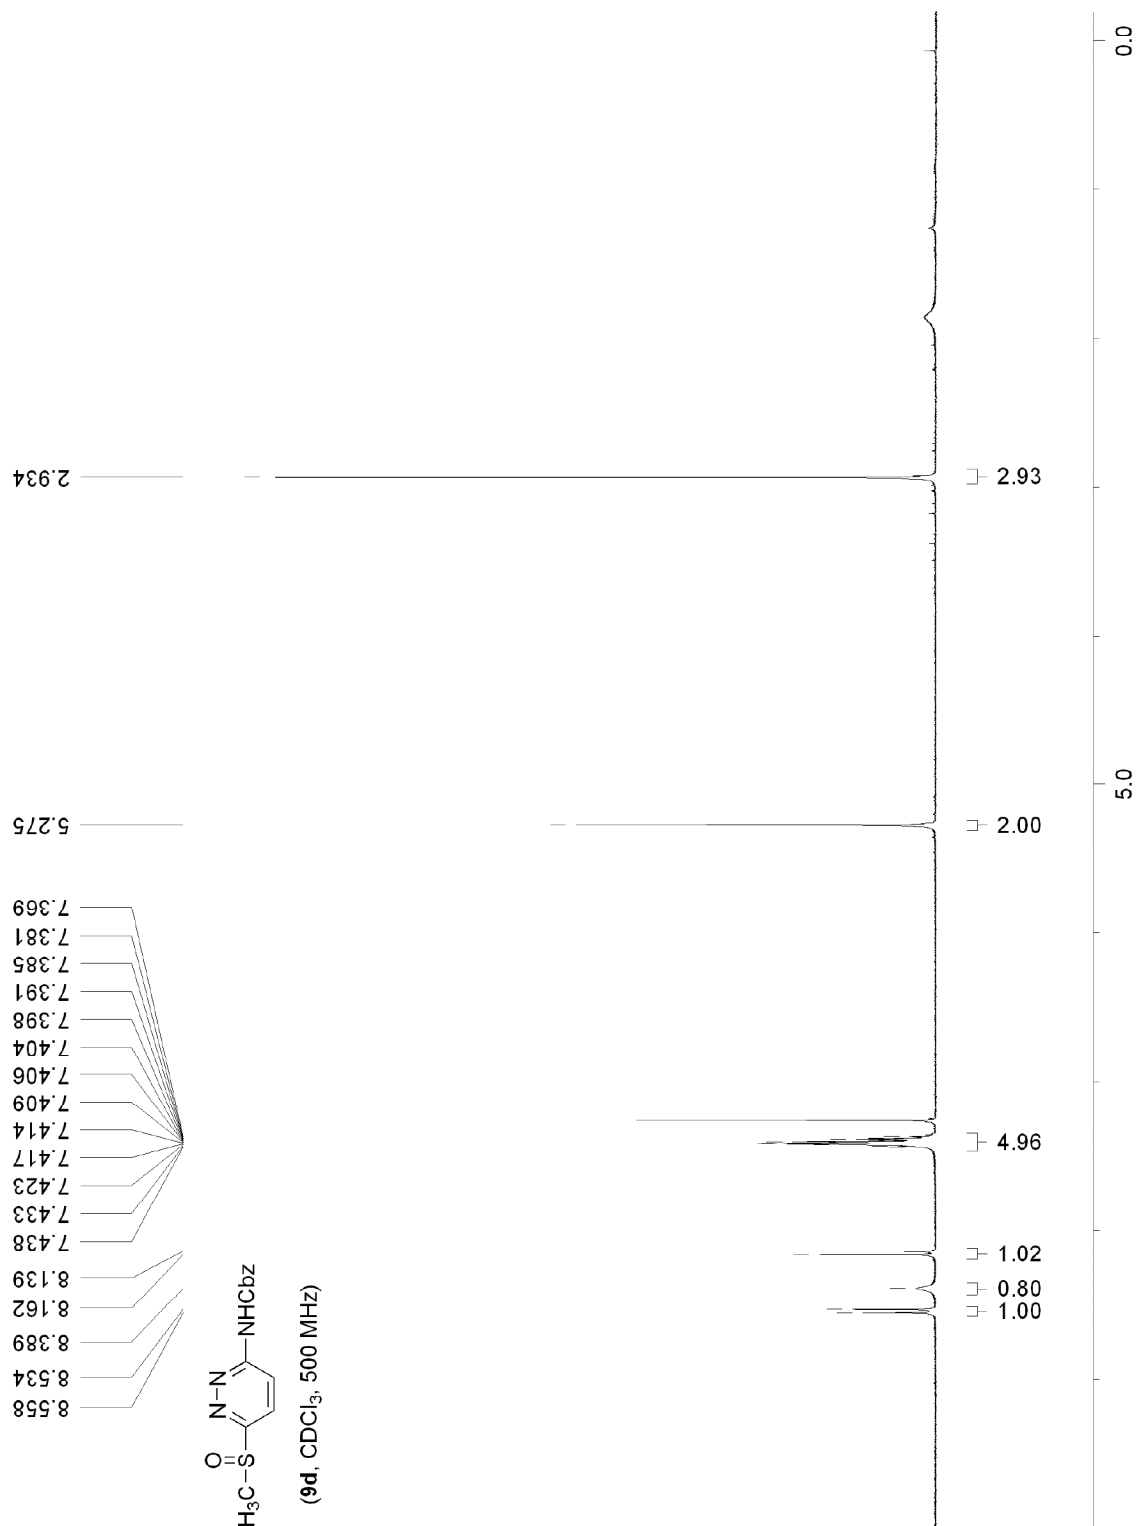

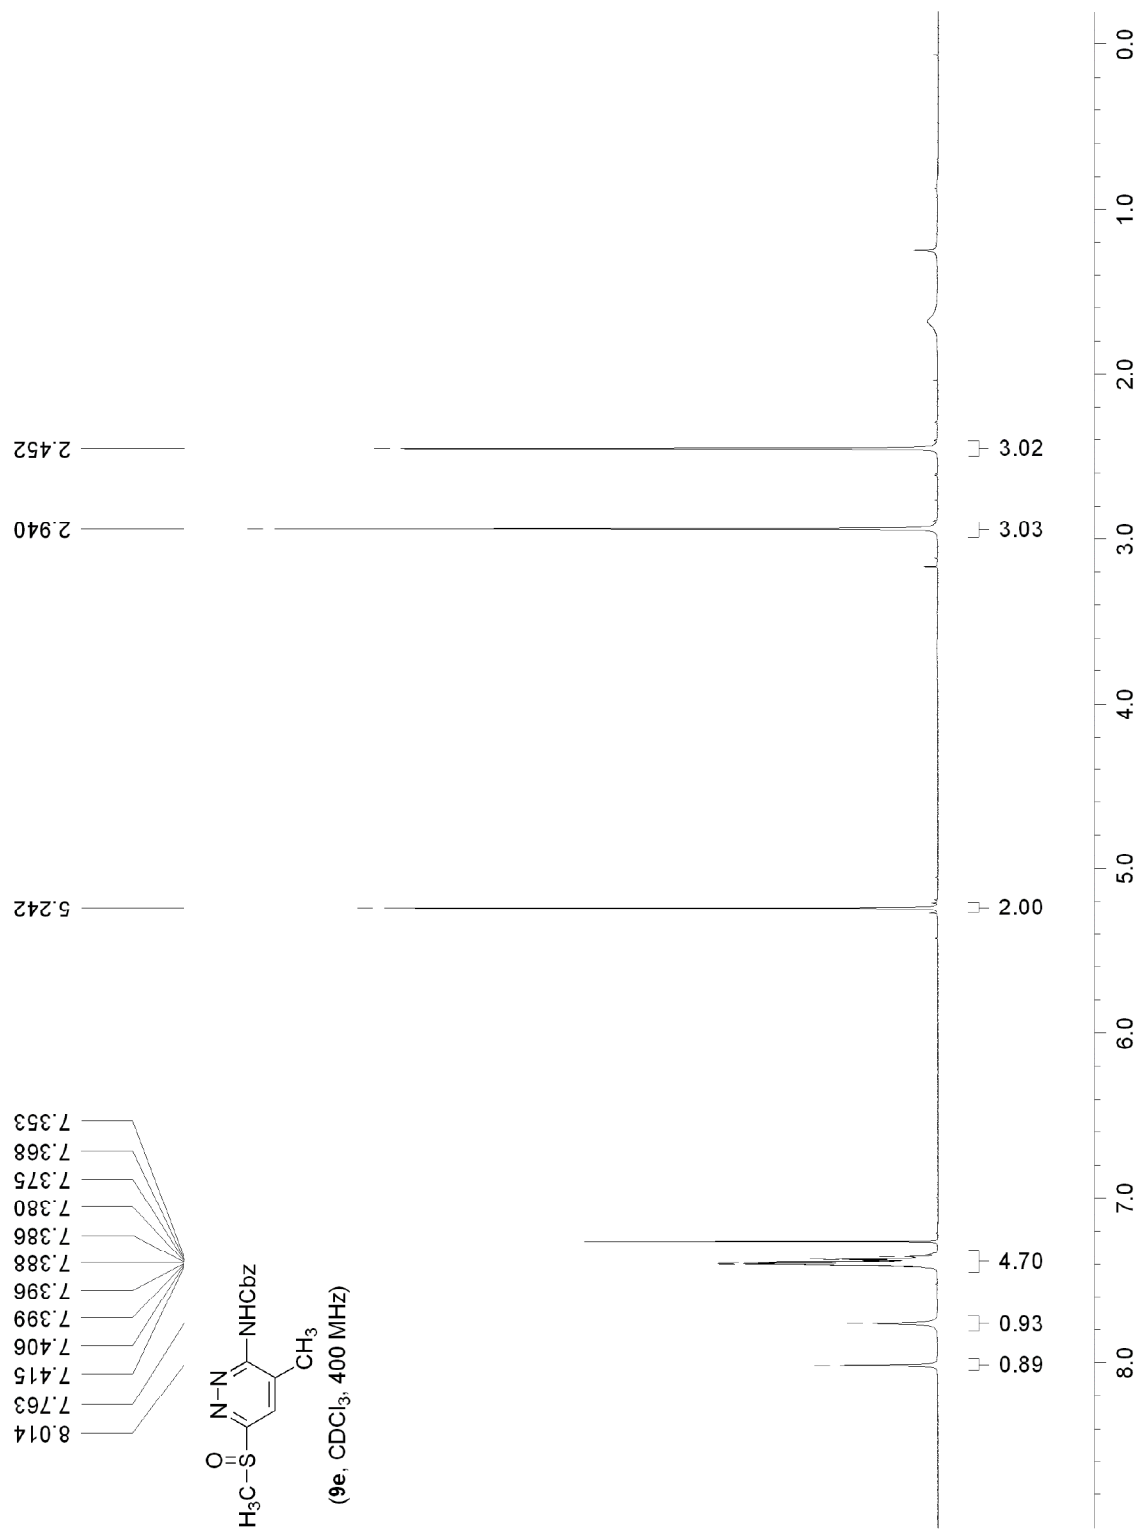

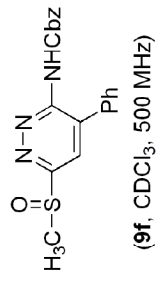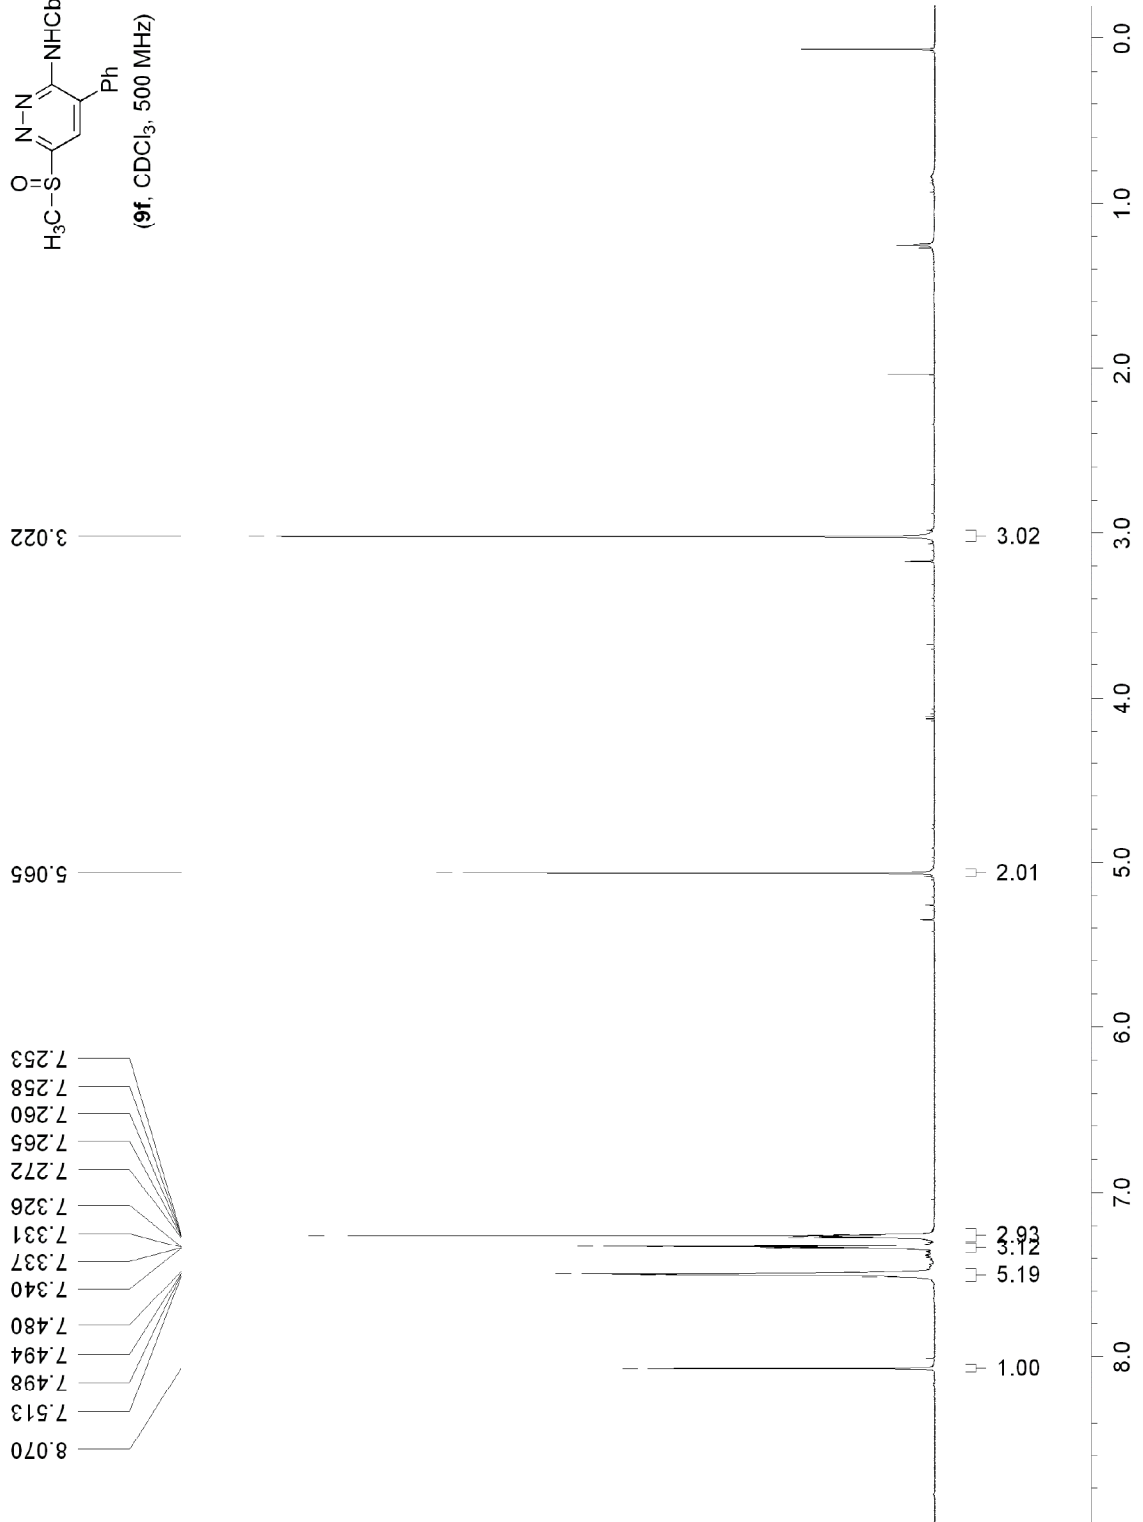

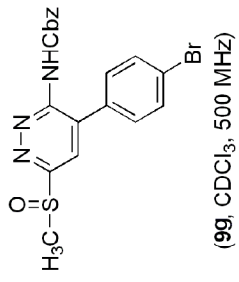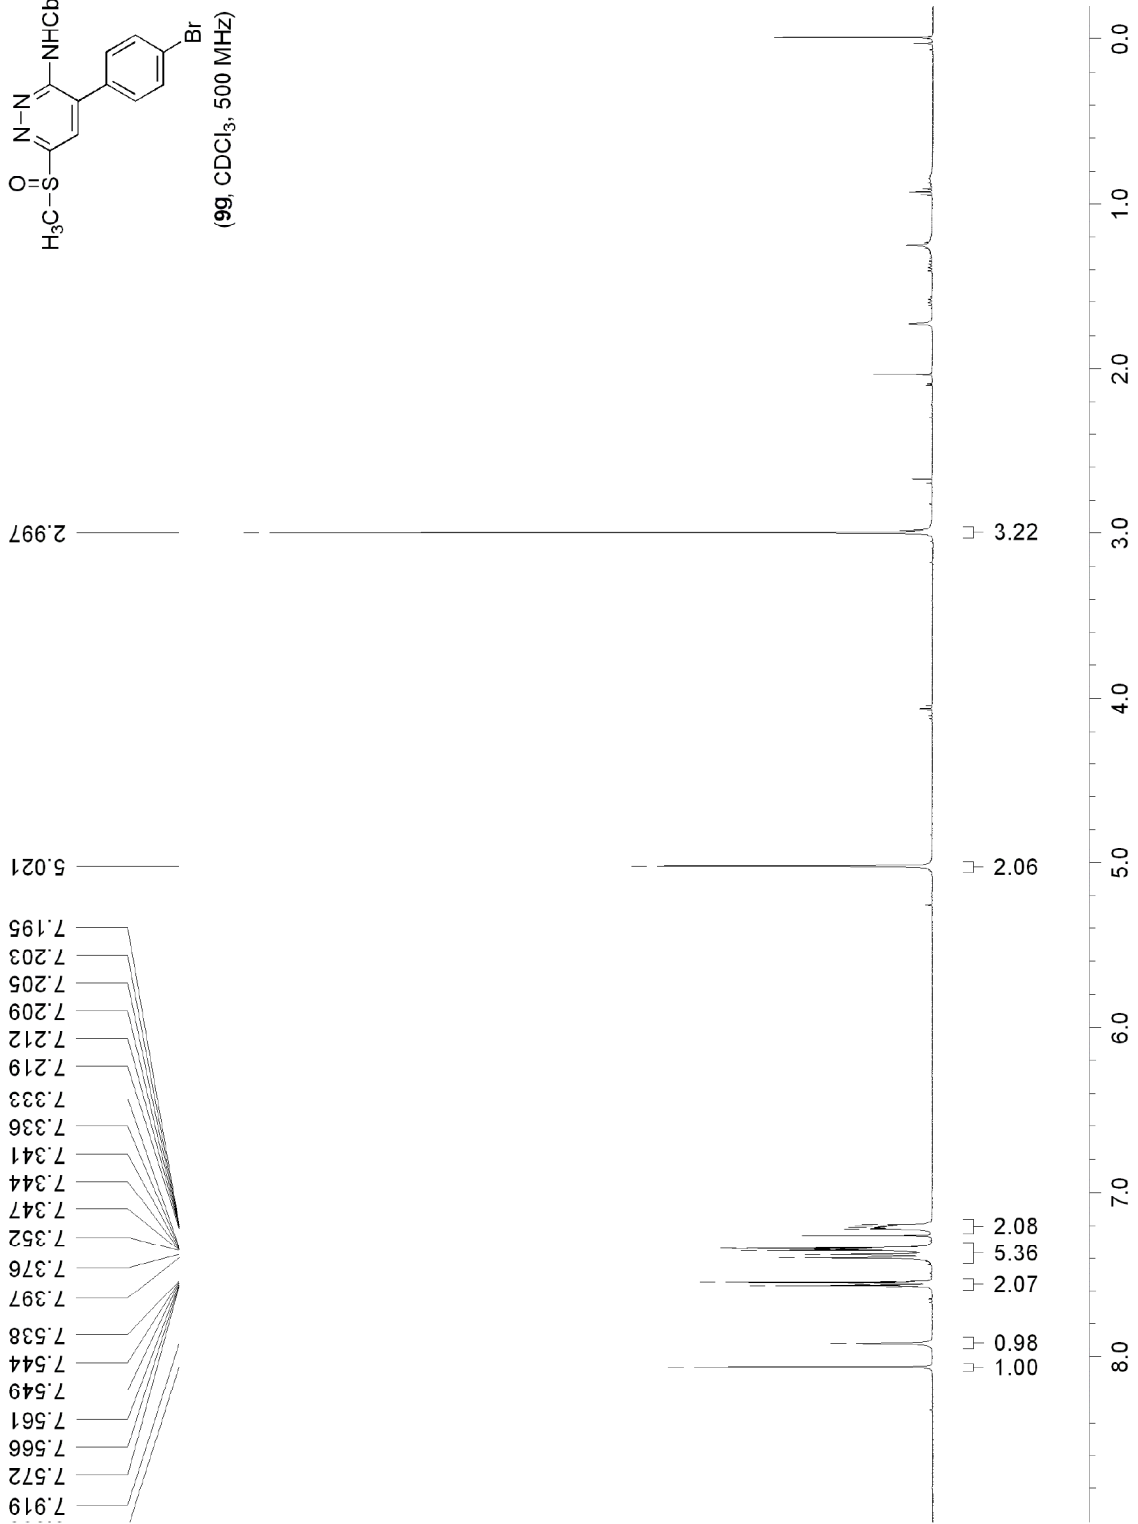

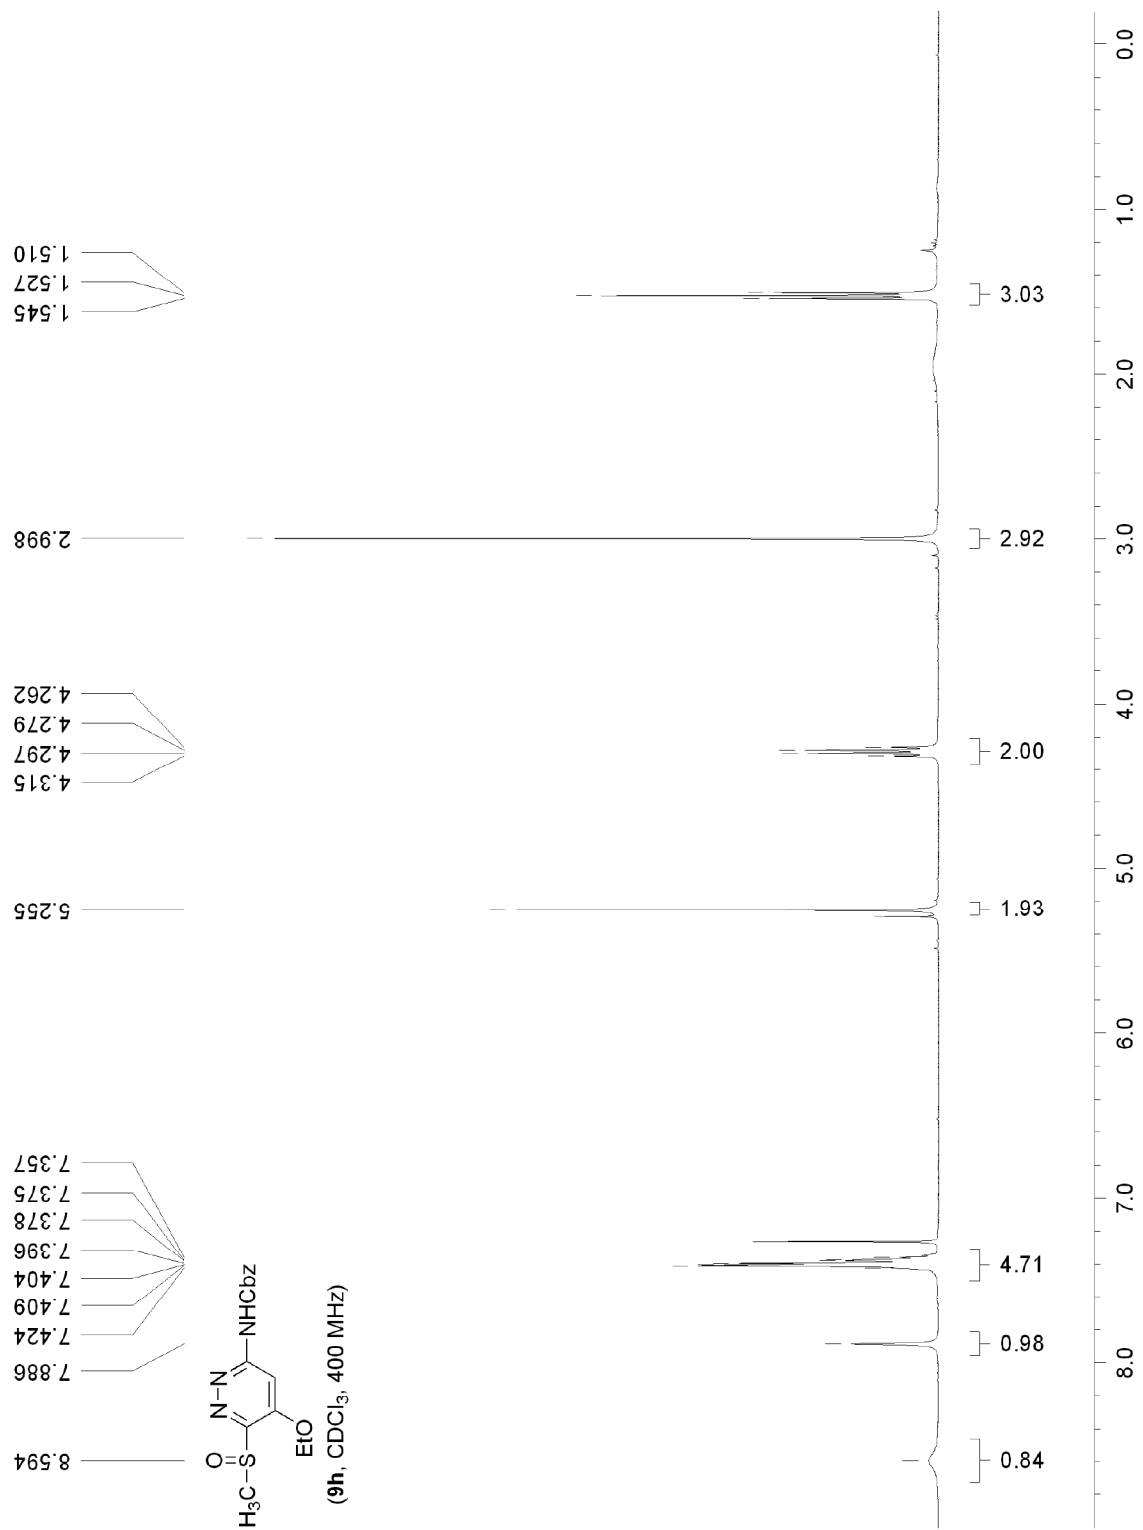



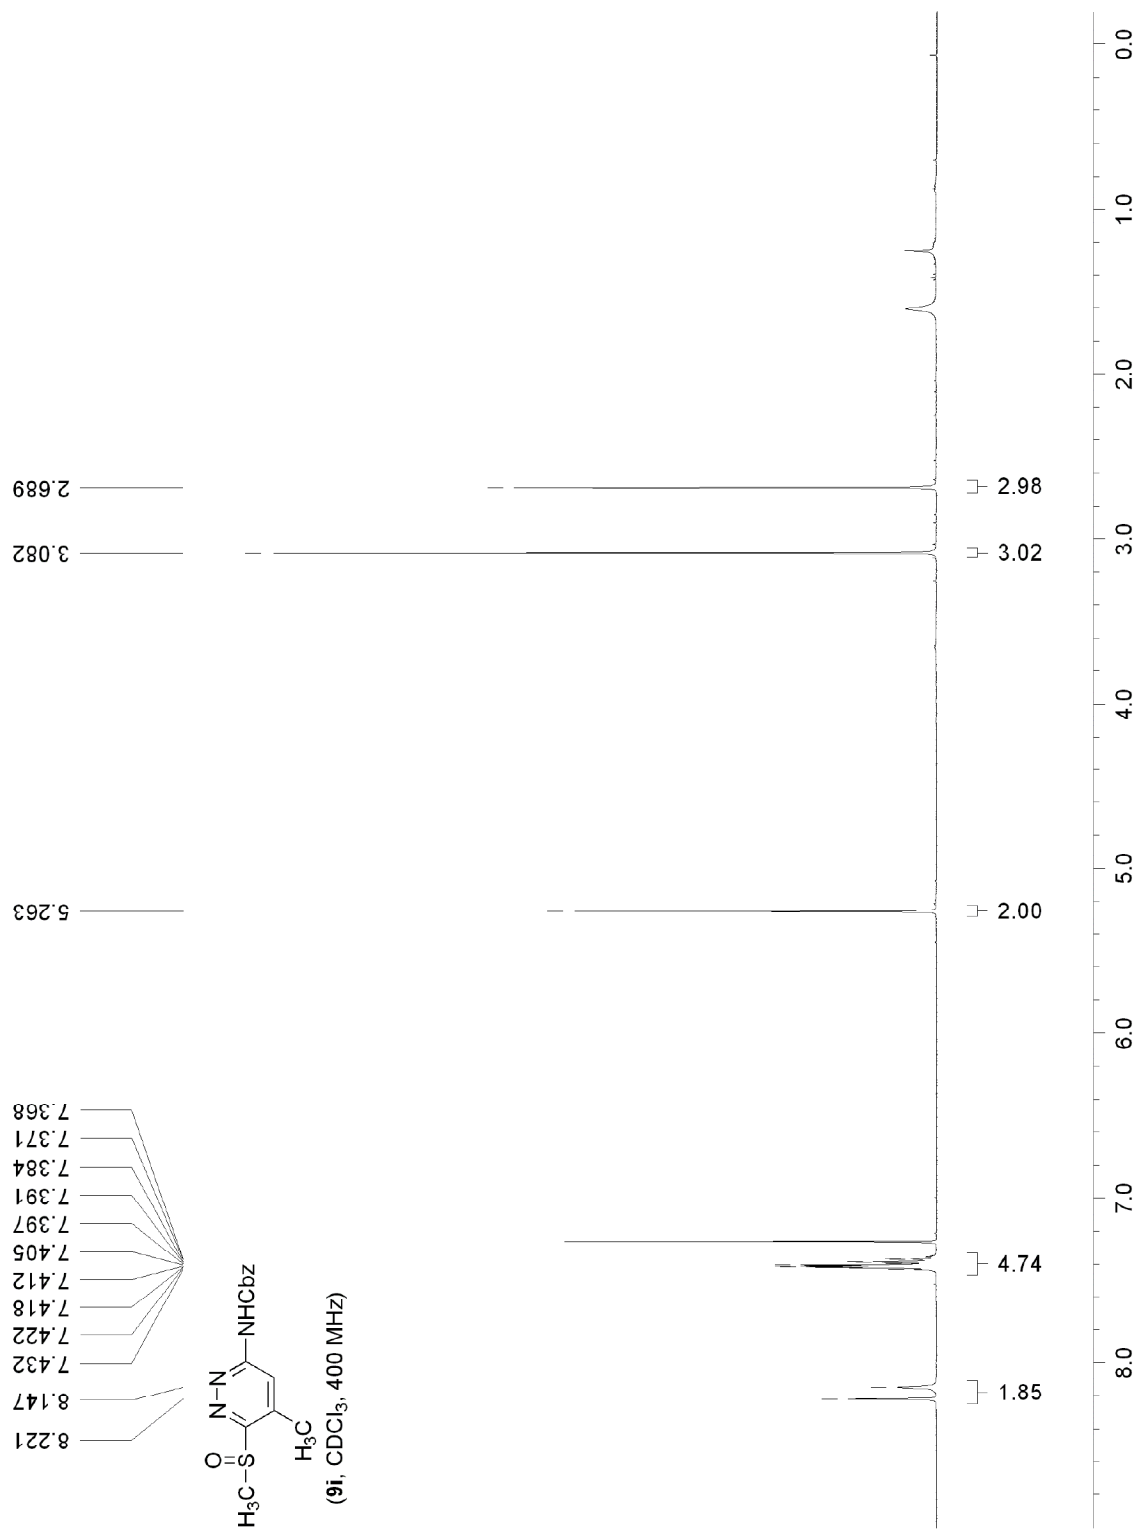

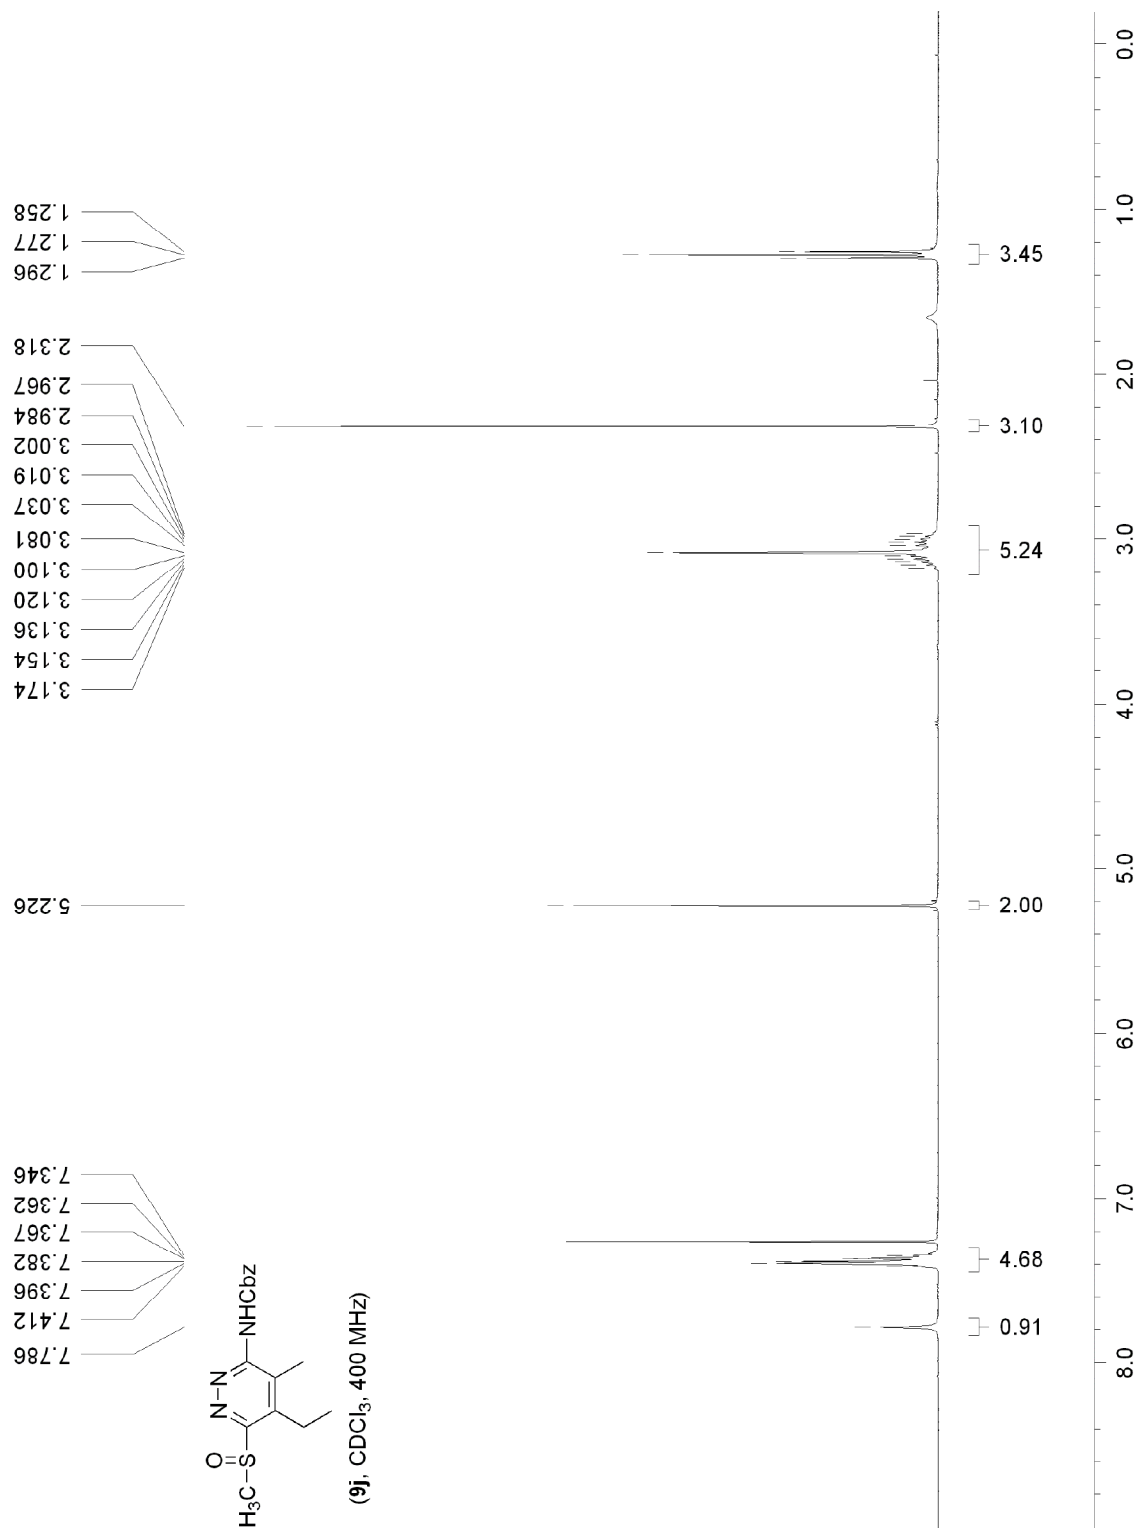

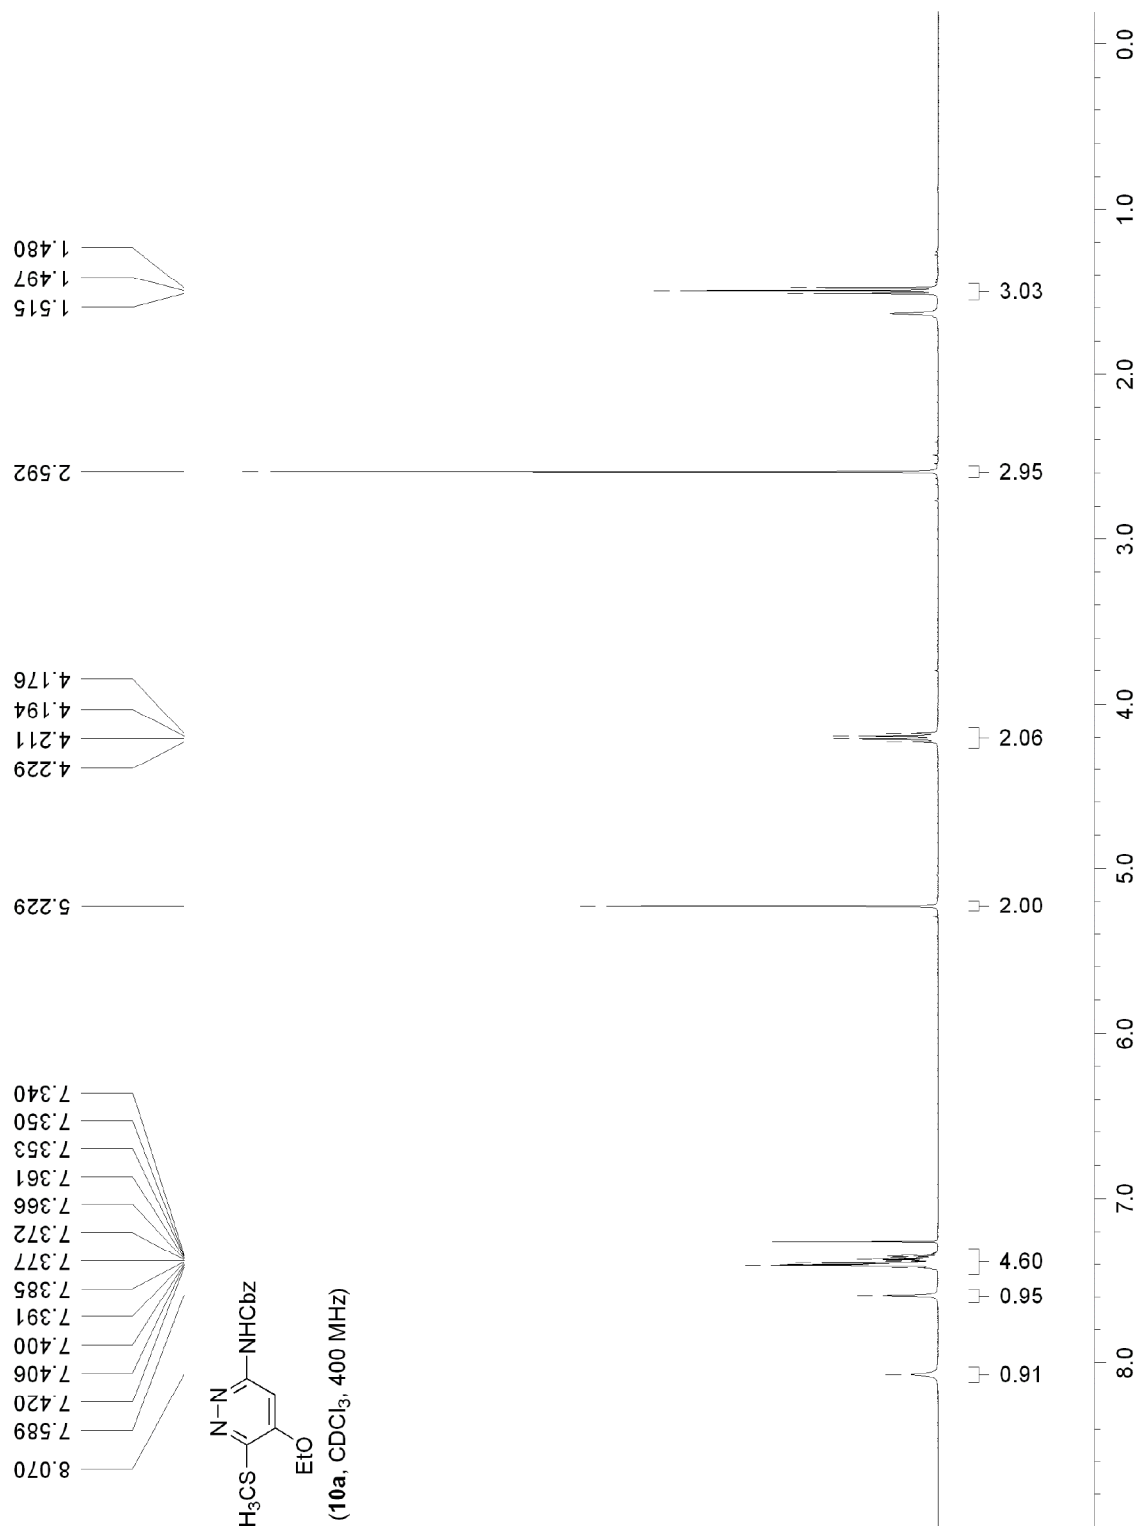

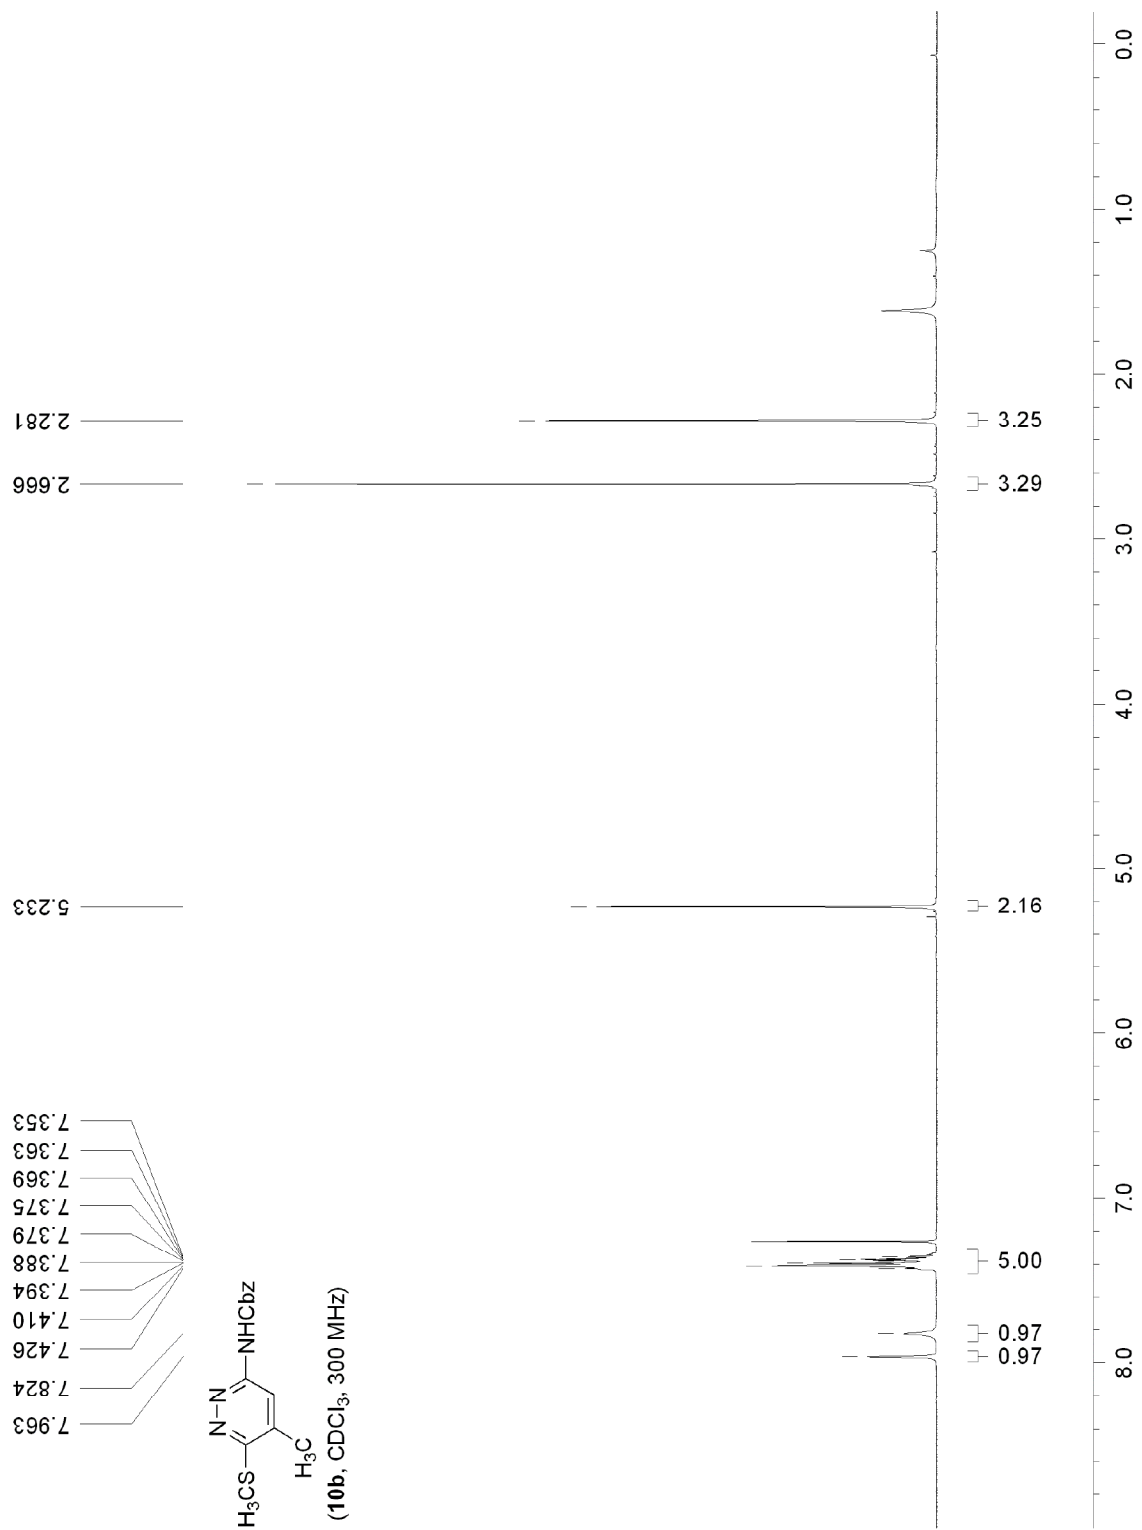

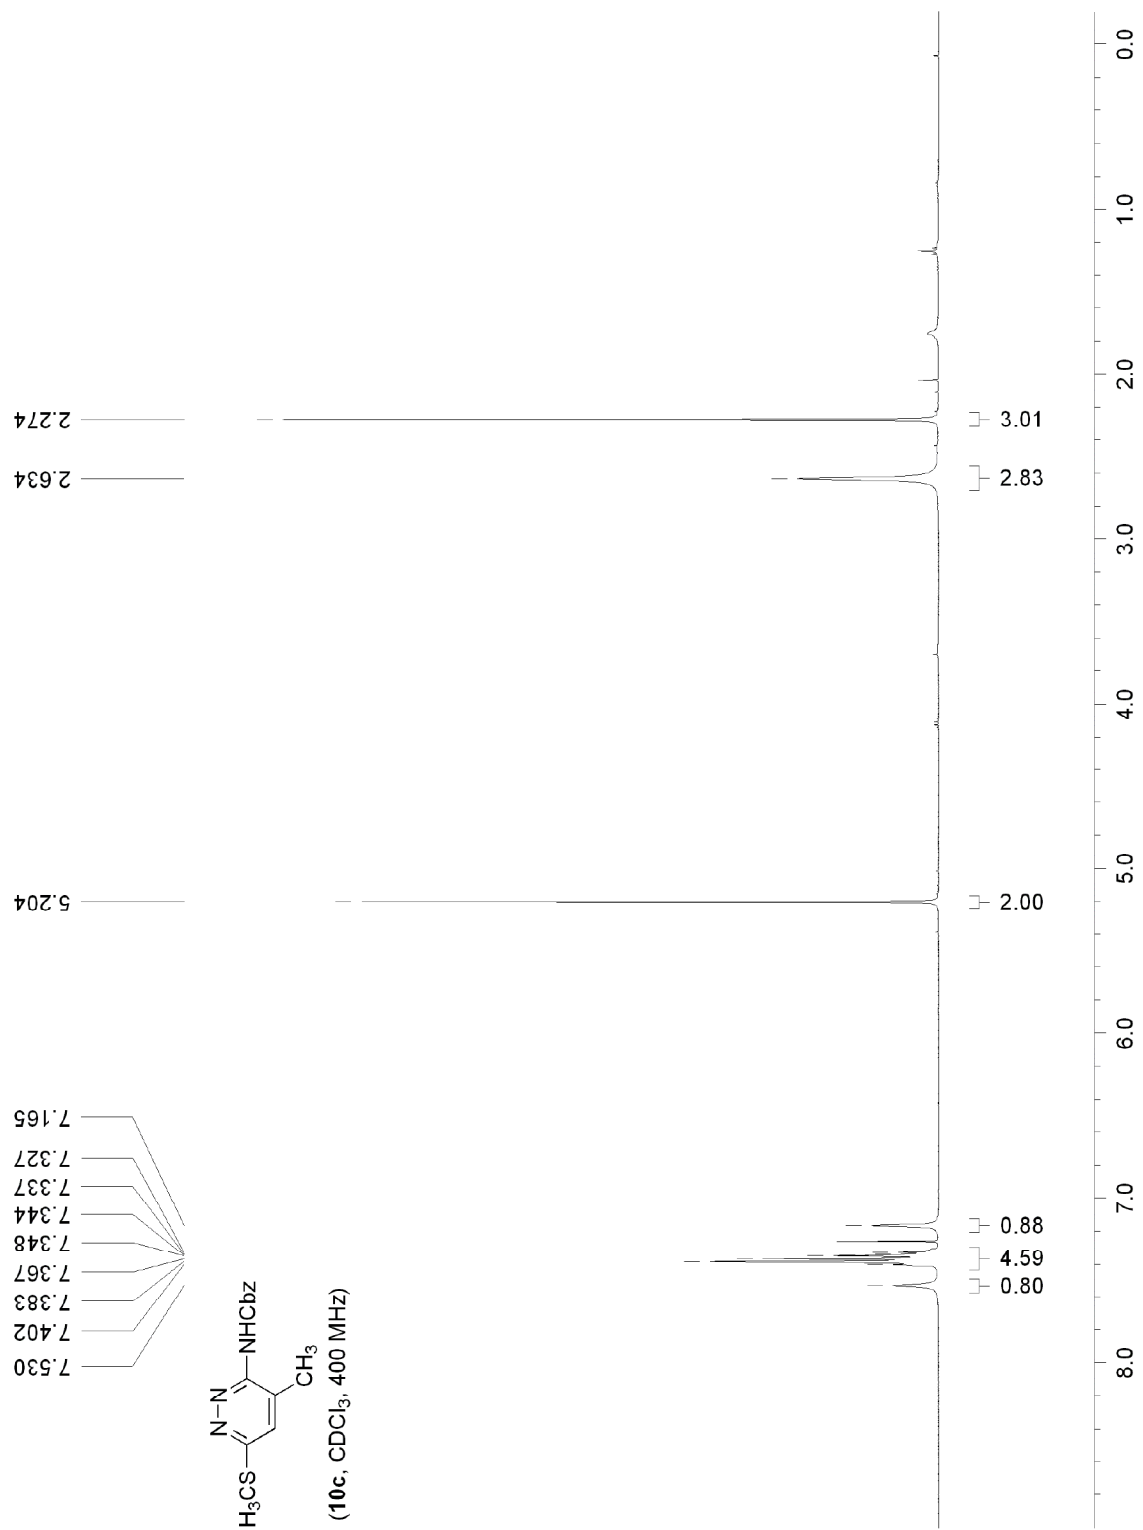

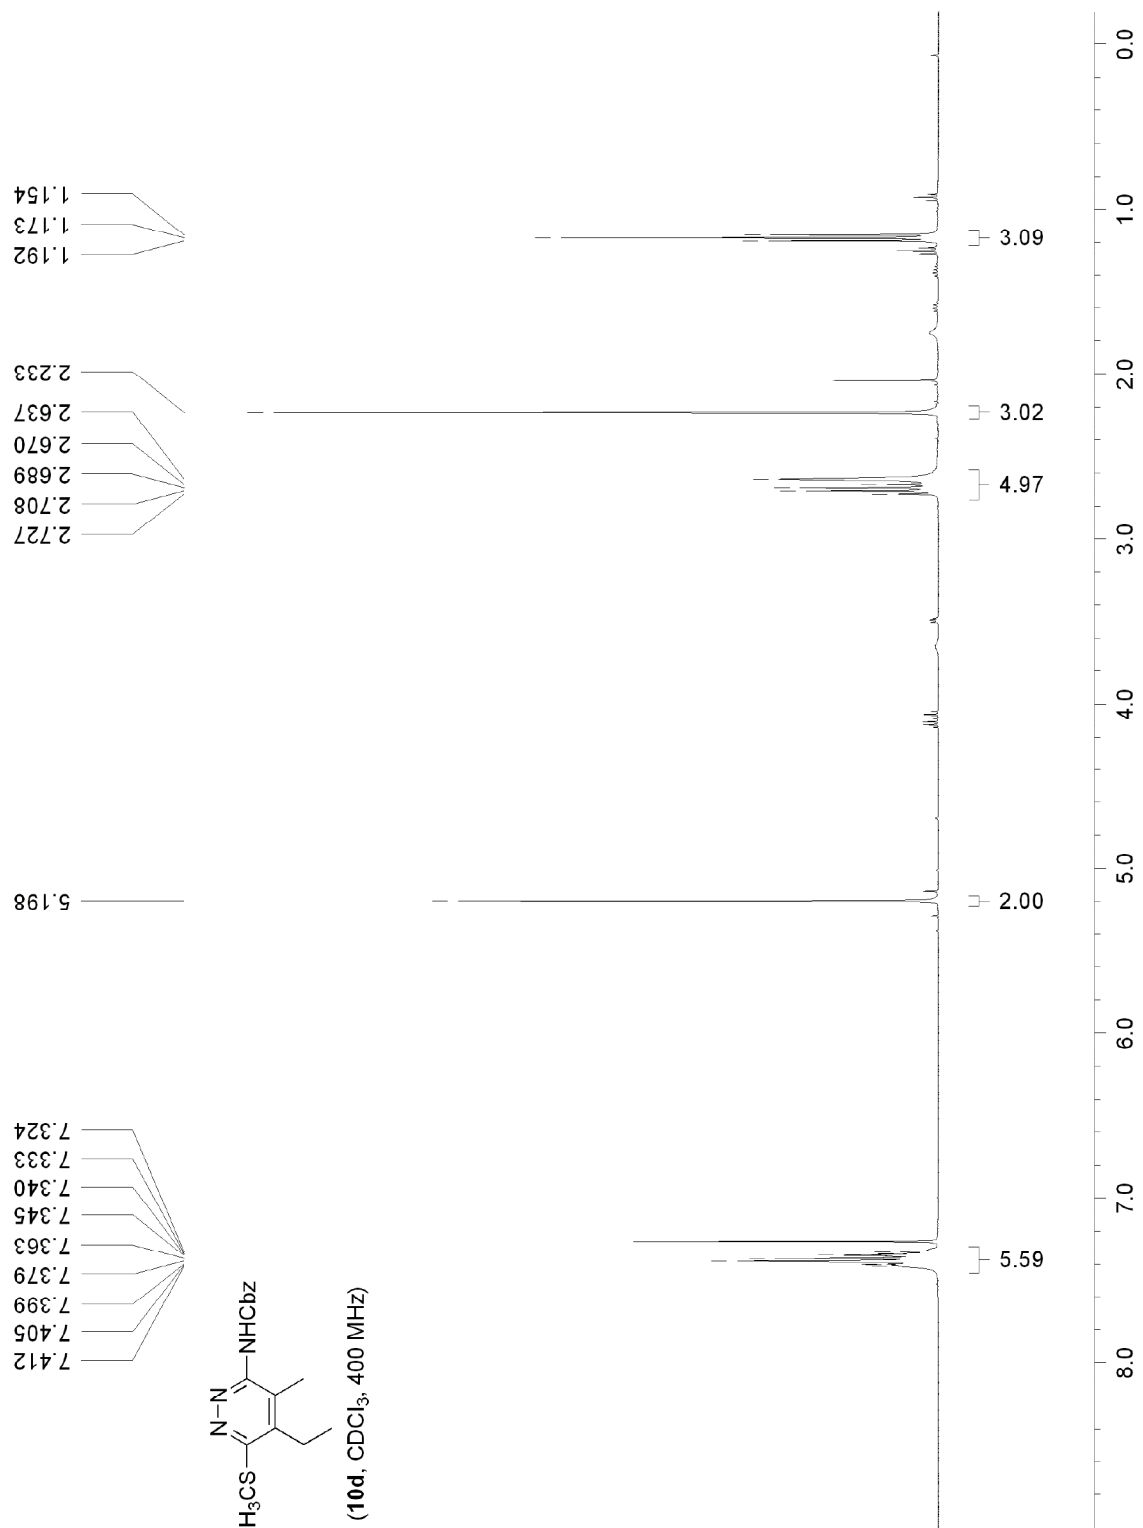

Supplement: NIHMS63113-supplement-5si20051017_05.pdf [file NIHMS63113-supplement-5si20051017_05.pdf]
